# Supplementary material for: Metabolic plasticity in synthetic lethal mutants: Viability at higher cost
Source: PLoS Comput Biol. 2018 Jan 30;14(1):e1005949. doi: 10.1371/journal.pcbi.1005949 (PMC5806928; doi:10.1371/journal.pcbi.1005949)
Supplement: S3 Table — The table reports FBA solution, PSL Clusters, control clusters, gene clusters and cluster entanglement for the organism S. enterica in minimal medium. (XLSX) [file pcbi.1005949.s003.xlsx]

## Sheet: FBA_solution
Reaction	Flux Value
R_OAO4t3ex	0
R_CTPS2	0.0933983
R_EX_12ppd_R_e	0
R_BALAtex	0
R_SPODMpp	0
R_ABZtex	0
R_ADCS	0.0238917
R_GPDDA3pp	0
R_NAt3pp	0
R_PGP180abcpp	0
R_GUR1PPpp	0
R_GLUtex	0
R_DOPAtex	0
R_PPAtex	0
R_ADCL	0.0238917
R_DAGK120	0
R_UDCPGT	0.0111933
R_N2Otpp	0
R_RMPA	0
R_FMNAT	0
R_NNATr	0.00130449
R_EX_anhgm_e	0
R_L_LACt2rpp	0
R_CHITOBpts	0
R_ATPS4rpp	37.0384
R_EX_pnto_R_e	0
R_PPAt4pp	0
R_DASYN141	0
R_DASYN140	0.00663281
R_CAt6pp	-1000
R_LPLIPAL2G141	0
R_EX_cl_e	-0.0022635
R_GALURtex	0
R_DTARTD	0
R_ATPM	8.39
R_SBTPD	0
R_FACOAE60	0
R_AACPS9	0
R_AACPS8	0
R_AACPS7	0
R_AACPS6	0
R_AACPS5	0
R_AACPS4	0
R_AACPS3	0
R_AACPS2	0
R_AACPS1	0
R_NTD2pp	0
R_MLTGY2pp	0
R_GLYCLTDx	0
R_GLYCLTDy	0
R_FEROXGtex	0
R_CFAS160G	0
R_HXAtex	0
R_AACTOOR	0
R_LPLIPAL1G120pp	0
R_EX_feoxam_un_e	0
R_TTONR2pp	0
R_2AGPEAT160	0
R_2AGPEAT161	0
R_ACOATA	0.105576
R_THYMtex	0
R_OAP10pp	0
R_EX_23cgmp_e	0
R_SALCHS2FEexs	0
R_EX_frulys_e	0
R_IDOND	0
R_TSULDHpp3	0
R_PGPP141pp	0
R_2AGPG161tipp	0
R_DHBSZ3tex	0
R_THRtex	0
R_EX_enlipa_e	0
R_2AGPEAT180	0
R_2AGPEAT181	0
R_HYD3pp	0
R_UDPG4E	0.0111933
R_DMPPS	0
R_PDXPP	0
R_GPDDA4pp	0
R_ALPATE160pp	0
R_ACPS1	0
R_PSD181	0.00109735
R_FEROXBFER1	0
R_HSTPT	0.0320832
R_EX_so4_e	-0.0582871
R_ADSL2r	0.21464
R_ACNAMt2pp	0
R_RNDR3	0
R_PROt4pp	0
R_H2tex	0
R_2AGPA181tipp	0
R_GALt2pp	0
R_UACGALPpp	0
R_DHAtpp	0
R_LYSDC	0
R_H2Stex	0
R_DPCOAK	2.81922e-05
R_G3PT	0
R_EX_3hcinnm_e	0
R_EX_h2o_e	24.6892
R_TMAOR1pp	0
R_FECRMtonex	0
R_LPLIPAL2E140	0
R_GALUi	0.0144177
R_URDGLYCD	0
R_EX_ile_L_e	0
R_GLCURtex	0
R_EX_so2_e	0
R_UAGCVT	0.0236069
R_HEPT4	0.00044773
R_HEPT3	0.00044773
R_HEPT2	0.00044773
R_HEPT1	0.00044773
R_ADOCBLPP	0
R_DHDPRy	0.172406
R_ADOCBLPS	0
R_MAN6Pt6_2pp	0
R_FALDtpp	0
R_FRUpts2pp	0
R_UDPKAAT	0
R_EX_ump_e	0
R_HSK	0.208905
R_EX_ura_e	0
R_SALCHS4FEHpp	0
R_CBLAT	0
R_CLPNS141pp	0
R_EX_halipa_e	0
R_ACCOAL	0
R_2AGPGAT140	0
R_LA4NTpp	0
R_4HOXPACMON	0
R_CYANSTpp	0
R_4HOXPACMOF	0
R_EX_glcur1p_e	0
R_CODSCL3MT	0
R_HSST	0.0500416
R_GLCRtex	0
R_ALCDPPAL	0
R_GAM6Pt6_2pp	0
R_EX_gua_e	0
R_CRNDt2rpp	1000
R_TRPtex	0
R_UHGADA	0.00089546
R_NMNN	0
R_EX_fe2_e	-0.00350204
R_CODSCL7MTDC	0
R_G3PGabcpp	0
R_EX_3amp_e	0
R_GSNK	0
R_FEENTERabcpp	0
R_TTONR1pp	0
R_EX_uacgam_e	0
R_NAMNPP	0
R_CU1Opp	0
R_UAGPT3	0.0236069
R_GTHRDabc2pp	0
R_EX_skm_e	0
R_CHITPH	0
R_4H2KPILY	0
R_DAAD	0
R_CYANtex	0
R_ASPTRS	0
R_ICL	0
R_PROabcpp	0
R_PPNCL2	2.81922e-05
R_CRNDCAL2	0
R_pa2_ST	0
R_ENTERGLCT2	0
R_ENTERGLCT1	0
R_TYRt2rpp	0
R_HG2abcpp	0
R_METOX1s	0
R_PYAM5PO	0
R_ASPO3	0
R_ASPO5	0.00130449
R_ASPO4	0
R_ASPO6	0
R_ACMANAtex	0
R_UGMDDS	0.0236069
R_MDDCP5pp	0
R_ALLTNtex	0
R_ASPabcpp	0
R_NI2tpp	0
R_EX_nmn_e	0
R_ACOAD1f	0
R_EX_cpgn_e	0
R_EX_gthox_e	0
R_EX_uri_e	0
R_CU2tex	0.001509
R_OA5L_ST	0.00044773
R_GLUCYS	0
R_PSCLYStex	0
R_PGM	-7.15057
R_PGL	1.17123
R_PGK	-8.36964
R_PGI	3.77839
R_URItex	0
R_THRPtex	0
R_UAPGR	0.0236069
R_CU1abcpp	0
R_GRXR	0
R_OAP12pp	0
R_ETHAt2pp	0
R_EX_udcpo5_e	0
R_EX_damp_e	0
R_PTRCt2pp	0
R_ACNAMtex	0
R_GUAt2pp	0
R_AGPR	-0.082572
R_ARGtex	0
R_SHKK	0.151413
R_AMMQLT8	0
R_PIuabcpp	0
R_PPK2r	0
R_G6Ptex	0
R_GDMANE	0
R_EX_gmp_e	0
R_LPLIPAL2ATE120	0
R_QULNS	0.00130449
R_GLCRt2rpp	0
R_EX_g3ps_e	0
R_PLIPA2E181pp	0
R_EX_pyr_e	0
R_CPGNUtpp	0
R_SUCBZS	0
R_EX_23dappa_e	0
R_GLYCtpp	-0.000331139
R_ENTERtex	0
R_FACOAE140	0
R_FACOAE141	0
R_ACGAL1Ptex	0
R_SUCBZL	0
R_SALCHS2FER3	0
R_SALCHS2FER2	0
R_PROGLYabcpp	0
R_FECRMabcpp	0
R_EX_n2o_e	0
R_NADS1	0.00130449
R_G3PCabcpp	0
R_MAN6Ptex	0
R_IMPD	0.126582
R_IMPC	-0.246723
R_EX_leu_L_e	0
R_ACtex	0
R_23CGMPtex	0
R_PA181abcpp	0.000137616
R_ACt4pp	0
R_A5PISO	0.00134319
R_NTD7pp	0
R_PUNP7	0
R_ETOHtex	0
R_PUNP1	-0.00355795
R_COLIPAtex	0
R_HIStex	0
R_PUNP2	0
R_EAR120y	0
R_EAR120x	0.0983009
R_GALT1	0.00044773
R_HG2tex	0
R_SALCHS2FER1	0
R_SADT2	0.0582871
R_GAL1PPpp	0
R_ALAt4pp	0
R_AOBUTDs	0
R_COB2NDARED	0
R_INSTtex	0
R_EX_3pg_e	0
R_EX_ser_L_e	0
R_DCMPtex	0
R_CDP4D6DGLCRx	0.0111933
R_UNK3	0.00334484
R_GLCtexi	0
R_CYStex	0
R_COBALT2tex	0.001509
R_EX_gthrd_e	0
R_TSULabcpp	0
R_AMANK	0
R_PNTOt4pp	0
R_RNDR4	0
R_PGP141abcpp	0
R_RNDR2	0
R_ARGt3pp	0
R_ALATA_D2	0
R_PYDXNtpp	0
R_DHNPA2	0.0238917
R_PA160abcpp	0.00348627
R_3HAD161	0.00727502
R_3HAD160	0.0810645
R_CHORS	0.151413
R_OPHHX3	0
R_LIPAabcpp	0
R_SADH	0
R_SERTRS2	0
R_CHORM	0.0855255
R_ATPPRT	0.0320832
R_DGMPtex	0
R_RBFSa	0
R_PAPA140	0
R_LPLIPAL2G140	0
R_GOFUCR	0
R_NTPTP1	0
R_DHBSZ3FEabcpp	0
R_EX_indole_e	0
R_DM_OXAM	0
R_SPODM	0
R_EAR80y	0
R_EAR80x	0.105576
R_CYStpp	0
R_5DGLCNt2rpp	0
R_PPNDH	0.0662946
R_LYSTRS	0
R_SDPDS	0.172406
R_FCI	0
R_EX_peamn_e	0
R_PUNP3	0
R_EX_csn_e	0
R_GLCt2pp	0
R_ACOTA	-0.082572
R_LPLIPAL1E141pp	0
R_URAtex	0
R_ACLS	0.234677
R_TREptspp	0
R_EX_glc_D_e	-5
R_OA4VL_ST	0
R_COBALT2t3pp	0
R_EX_galctn_L_e	0
R_PEPtex	0
R_LYStex	0
R_OCDCEAt2pp	0
R_GTPDPK	0
R_GLYC3Pt6pp	0
R_EAR180y	0
R_EAR180x	0.00207858
R_D_LACt2pp	0
R_RNTR3c	0.0136503
R_EX_galctn_D_e	0
R_EX_thym_e	0
R_SULFACtex	0
R_23PDE7pp	0
R_PSD161	0.00146313
R_PSD160	0.0277994
R_CUtex	0
R_THRS	0.208905
R_PLIPA2A140pp	0
R_P5CR	0.122789
R_PDH	4.40379
R_DCAtex	0
R_KARA1	-0.234677
R_KARA2	0.041744
R_THRD	0
R_PItex	0.423754
R_EX_xylu_L_e	0
R_P5CD	0
R_FLVR	0
R_SGSAD	0
R_CTBTCAL2	0
R_PG160abcpp	0.00813464
R_LPLIPAL1G181pp	0
R_TDPDRR	0.011641
R_GTHRDabcpp	0
R_PLIPA1A120pp	0
R_TAGptspp	0
R_TDPDRE	0.011641
R_EX_dms_e	0
R_IGPDH	0.0320832
R_GK1	0.126582
R_SALCHS2FEabcpp	0
R_FLDR	0
R_TDP	0
R_ECOAH5	0
R_ECOAH4	0
R_ECOAH7	0
R_ECOAH6	0
R_ECOAH1	0
R_GLYCLTt2rpp	0
R_ECOAH3	0
R_ECOAH2	0
R_PE181abcpp	0.00109735
R_EX_airs_e	0
R_ECOAH8	0
R_UREAtpp	0
R_PLIPA1A161pp	0
R_ALLTNt2rpp	0
R_OHPBAT	0
R_EX_tyr_L_e	0
R_ACMUMtex	0
R_RMNtex	0
R_LPLIPAL2A120	0
R_H2SO	0
R_peptido_ST	0.0118034
R_12DGR120tipp	0
R_clpn2_ST	0
R_DASYN161	0.00189509
R_DASYN160	0.0360067
R_PLIPA1E181pp	0
R_ADSK	0.0582871
R_PSCVT	0.151413
R_DHFS	0.0238917
R_DHFR	0.0363808
R_GLYBtex	1000
R_IPDPS	0
R_URIt2pp	1000
R_MALTHXabcpp	0
R_EAR121x	0.00727502
R_EAR121y	0
R_EX_duri_e	0
R_MANGLYCtex	0
R_CLt3_2pp	0.00113175
R_AMPTASECG	0
R_MALTATr	0
R_DXYLUDtex	0
R_3OAR60	0.105576
R_LPLIPAL1A161pp	0
R_METTRS	0
R_LPADSS	0.00044773
R_URIDK2r	-0.0124891
R_TCBt2ex	0
R_EX_eca4colipa_e	0
R_DMStex	0
R_CYSabcpp	0
R_ADNUC	0
R_PPM	-0.00355795
R_PFK	4.12964
R_PFL	0
R_CPGNR1	0
R_CPGNR3	0
R_CPGNR2	0
R_NADPHQR3	0
R_NADPHQR2	0
R_HEXt2rpp	0
R_NADPHQR4	0
R_UAG2E	0
R_5DGLCNR	0
R_2AGPA141tipp	0
R_FA161ACPHi	0
R_FEROXBFER2	0
R_FEROXBFER3	0
R_TMAOtex	0
R_DRPA	0
R_CGLYabcpp	0
R_MANptspp	0
R_PLIPA2E140pp	0
R_CLPNS140pp	4.68277e-05
R_EX_fald_e	0
R_UDPGALM	0
R_SBTtex	0
R_PMANM	-0.0111933
R_MTHFD	0.84423
R_MTHFC	0.84423
R_NADH10	0
R_NTD9pp	0
R_KDOCT2	0.00134319
R_FORt2pp	0
R_QMO2	0
R_QMO3	0
R_PGPP120	0
R_LPLIPAL1G160pp	0
R_OXGDC2	0
R_FEROXGFEabcpp	0
R_TREtex	0
R_PRAMPC	0.0320832
R_OPHBDC	0
R_FLVRx	0
R_PLIPA1E120pp	0
R_PMPK	0
R_MEPCT	0
R_RBFK	0
R_GLNS	0.891015
R_LPLIPAL1A120pp	0
R_GLYCDx	0
R_PLIPA2G140pp	0
R_FRUtex	0
R_ADCOBNSYN	0
R_FUMt2_3pp	0
R_ME1	0
R_ME2	0
R_CITt4pp	0
R_LPLIPAL2E181	0
R_LPLIPAL2E180	0
R_EX_agm_e	0
R_EX_acgam1p_e	0
R_DHPTDCs	0.000213114
R_EAR181x	0.00311786
R_EAR181y	0
R_GHMT2r	0.930894
R_EX_urea_e	0
R_METSOXR2	0
R_LPLIPAL2ATG180	0
R_LPLIPAL2ATG181	0
R_GLCtex	5
R_EX_trp_L_e	0
R_TKT1	0.282778
R_TKT2	0.129574
R_DHAD1	0.234677
R_HYD1pp	0
R_DHAD2	0.041744
R_LPLIPAL1A160pp	0
R_DCYTtex	0
R_SUCCtex	0
R_MALTHXtexi	0
R_EX_pheme_e	0
R_FEROXEtex	0
R_LPLIPAL1E181pp	0
R_GLCptspp	5
R_DRBK	0
R_G3PEabcpp	0
R_3AMPtex	0
R_MDDCP2pp	0
R_ADNtex	0
R_AGM4Pt2pp	0
R_EX_thrp_e	0
R_PTRCTA	0
R_PE161abcpp	0.00146313
R_FE3Ri	0
R_ASNS2	0.1303
R_ASNS1	0
R_CRNBTCT	0
R_PAPA180	0
R_TDSR1	0
R_TDSR2	0
R_EX_acgal_e	0
R_EX_rnam_e	0
R_SCYSSL	0
R_23CCMPtex	0
R_DHBSZ3FEexs	0
R_TPRDCOAS	0
R_PFK_2	0
R_EX_SALCHS4FE_e	0
R_U23GAAT	0.00089546
R_PAPA161	0
R_PAPA160	0
R_FBP	0
R_DCTPD	0
R_ACKr	0.141755
R_EX_tartr_D_e	0
R_FBA	4.12964
R_DHORD2	0.18117
R_ORLT	0
R_REMNANT1tex	0
R_MICITD	0
R_FMNRx	0
R_RNTR2c	0.0136503
R_ADNCYC	0
R_PLIPA1E141pp	0
R_ACOAD3f	0
R_14GLUCANtexi	0
R_RPE	0.412352
R_EX_cd2_e	0
R_EX_akg_e	0
R_EX_adocbl_e	0
R_CITt7pp	0
R_SUCCt2_2pp	0
R_SO3R	0.0582871
R_NTP3	0
R_OAP8pp	0
R_MTRI	0.00334484
R_LALGP	0
R_INDOLEt2rpp	0
R_EX_LalaDgluMdap_e	0
R_3OAR100	0.105576
R_GALCTND	0
R_EX_h_e	4.05089
R_EX_arab_L_e	0
R_MECDPDH2	0
R_EX_met_D_e	0
R_GART	0
R_DCYTt2pp	0
R_PA140abcpp	0.000642208
R_EX_dxyl_e	0
R_CFAS180G	0
R_CFAS180E	0
R_CRNt8pp	1000
R_OAP1pp	0
R_EX_mal_D_e	0
R_ADOCBLtonex	0
R_MLTP1	0
R_FE3DHBZStonex	0
R_GLDBRAN2	0
R_PALDH	0
R_2PGt6pp	0
R_FRD3	0
R_FRD2	0
R_RIBabcpp	0
R_PLIPA1G181pp	0
R_TMAOR2pp	0
R_EX_met_L_e	0
R_OAP16pp	0
R_FACOAE160	0
R_HPPK2	0.0238917
R_UM4PL	0
R_X5PL3E	0
R_EX_ins_e	0
R_FACOAL160t2pp	0
R_GLUNpp	0
R_3OAS160	0.0810645
R_FUCtex	0
R_NADH16pp	19.7065
R_PE180abcpp	0.000731563
R_ADA	0
R_SALCHS2FEtonex	0
R_EX_glyc_R_e	0
R_EX_hdca_e	0
R_DRIBtpp	0
R_DHBZS2H	0
R_EX_ddca_e	0
R_RBP4E	0
R_CYTDt2rpp	-1000
R_MALTTRabcpp	0
R_CTBTt2rpp	0
R_AMPtex	0
R_SELNPS	0
R_XYLI1	0
R_XYLI2	0
R_CBIuabcpp	0
R_PYNP2r	0
R_DXPRIi	0
R_FEROXEFEabcpp	0
R_HPYRI	-1000
R_PHETRS	0
R_FACOAL141t2pp	0
R_LEUt2rpp	1000
R_PLIPA1E140pp	0
R_EX_g1p_e	0
R_CPPPGO2	0
R_XYLtex	0
R_3NTD2pp	0
R_EX_isetac_e	0
R_EX_acon_C_e	0
R_PRPPS	0.471192
R_SALCHS2H	0
R_DSBCGT	0
R_MG2t3_2pp	0.0037725
R_PE120abcpp	0
R_LPLIPAL1E140pp	0
R_ACOLIPAtex	0
R_PYDXNK	0
R_FE3DHBZSabcpp	0
R_EX_tungs_e	0
R_ECAtpp	0
R_FEENTERR3	0
R_D5KGPA	0
R_H2tpp	0
R_MDDCP4pp	0
R_DHAtex	0
R_MOAT	0.00044773
R_FEROXEFER3	0
R_FEROXEFER2	0
R_FEROXEFER1	0
R_UACMAMO	0
R_LPLIPAL2E141	0
R_DHPS2	0.0238917
R_ASPt2pp	0
R_2PGtex	0
R_EX_pacald_e	0
R_PPALtpp	0
R_PLIPA1G160pp	0
R_G1Ptex	0
R_AGM4PCPpp	0
R_EAR100y	0
R_EAR100x	0.0983009
R_PLIPA1G180pp	0
R_FE3HOXexs	0
R_MLTP3	0
R_EX_lys_L_e	0
R_NOtex	0
R_OAP15pp	0
R_AU1abcpp	0
R_ACGAtex	0
R_PLIPA2A141pp	0
R_FE2tpp	0.00350204
R_OMPHHX	0
R_PAPA141pp	0
R_SHK3Dr	0.151413
R_LPLIPAL1G180pp	0
R_CRNCAL2	0
R_ZN2abcpp	0
R_EX_mmet_e	0
R_TCBO	0
R_ACOAD2f	0
R_OROTt2_2pp	0
R_NADH17pp	0
R_LPLIPAL2A181	0
R_LPLIPAL2A180	0
R_GTHRDHpp	0
R_3HAD100	0.105576
R_ARBtex	0
R_SKMtex	0
R_EX_enter_e	0
R_colipa20Oagtex	0
R_NTP11	0
R_GAL1Ptex	0
R_ACODA	0.082572
R_NTP12	0
R_FA140ACPHi	0
R_EX_sulfac_e	0
R_TRE6PS	0
R_ADNt2rpp	-1000
R_FEENTERexs	0
R_TAURtex	0
R_CLPNS180pp	0
R_GLYC3Pabcpp	0
R_MLTGY4pp	0
R_2AGPE141tipp	0
R_SFGTHi	0
R_ASP1DC	2.81922e-05
R_ENTERHpp	0
R_EX_salchs2_e	0
R_DHORD5	0
R_ASNNpp	0
R_GLUTRS	0.000852455
R_GLUTRR	0.000852455
R_EX_sucr_e	0
R_AKGtex	0
R_2AGPA140tipp	0
R_COLIPAabcpp	0.00044773
R_HISabcpp	0
R_EX_3ump_e	0
R_RNDR1b	0
R_UDPGLCURtex	0
R_USHD	0.00044773
R_PGP160abcpp	0
R_NTD10pp	0
R_NAt3_2pp	0
R_EX_galct_D_e	0
R_D_LACtex	0
R_ARBTNtonex	0
R_FRUK	0
R_PNTK	2.81922e-05
R_FCLPA	0
R_ZN2tpp	0.001509
R_SALCHSXtex	0
R_EX_cu2_e	-0.001509
R_PSSA120	0
R_ACCOAC	0.726544
R_TRE6PH	0
R_CLPNH180pp	0
R_3GMPtex	0
R_SUCRtex	0
R_EX_tcynt_e	0
R_2DGULRx	0
R_2DGULRy	0
R_EX_cpgn_un_e	0
R_ABUTtex	0
R_EX_23camp_e	0
R_PROTRS	0
R_DHBZS3H	0
R_FEOXAMR3	0
R_FEOXAMR2	0
R_GLYt2pp	0
R_EX_fe3dhbzs3_e	0
R_EX_metsox_R_L_e	0
R_PAPA140pp	0.000628829
R_GALURt2rpp	0
R_PLIPA2E141pp	0
R_ASPTA	-1.32016
R_PPKr	0
R_2AGPE160tipp	0
R_FACOAE80	0
R_3OAR40	0.105576
R_ASCBptspp	0
R_M1PD	0
R_2AGPGAT141	0
R_EX_15dap_e	0
R_SARCOX	0
R_LEUTAi	0.0986684
R_FOAMtex	0
R_NTD1pp	0
R_RIBtex	0
R_UMPtex	0
R_CRNt2rpp	-1000
R_G6PDA	0
R_5C2O3EDDC	0
R_ORNabcpp	0
R_EX_succ_e	0
R_MLDCP1Bpp	0
R_METDabcpp	0
R_NTD8pp	0
R_GULNLtpp	0
R_CODSCL6BMT	0
R_CRNtex	0
R_GLCP2	0
R_23DAPPAtex	0
R_DKMPPD3	0.00334484
R_EX_23ccmp_e	0
R_udcdpgalrmnmanabetpp	0
R_PTAr	-0.141755
R_OCBT	0.062503
R_34DHPACDO	0
R_CYTDK2	0
R_OMLT	0
R_IPDDI	0
R_CLIPAtex	0
R_EX_xmp_e	0
R_LSERDHr	0
R_DURIt2pp	0
R_GMPR	0
R_XTSNH	0
R_OAP18pp	0
R_4PEPTtex	0
R_PLIPA1E180pp	0
R_PGPP140	0.00149849
R_PGPP141	0
R_DSBDR	0
R_CODSCL5BMT	0
R_ENTCS	0
R_NH4tpp	5.26579
R_CPGNexs	0
R_METtex	0
R_PLIPA1A181pp	0
R_NADN	0
R_EDTXS4	0
R_EDTXS3	0
R_EDTXS2	0.00044773
R_EDTXS1	0.00044773
R_NADK	0.000253252
R_PLIPA2G180pp	0
R_FALDH2	0
R_FE2t2pp	0
R_ARGSS	0.062503
R_BPNT	0.0582871
R_FEROXBFEabcpp	0
R_EX_spmd_e	0
R_EX_arbtn_fe3_e	0
R_PHETA1	-0.0662946
R_HETZK	0
R_PPBNGS	0.000426228
R_MDDEP1pp	0
R_OGLT	0
R_DOGULNR	0
R_2AGPE120tipp	0
R_DDGALK	0
R_LPLIPAL1A181pp	0
R_2AGPGAT180	0
R_CLPNH140pp	0
R_2AGPE140tipp	0
R_EX_dimp_e	0
R_EX_ppa_e	0
R_EX_cys_D_e	0
R_ACGAM1PPpp	0
R_THMDtex	0
R_NO3t7pp	0
R_EX_r5p_e	0
R_EX_14glucan_e	0
R_F6PP	0
R_FEROXBFEtex	0
R_HDCAt2pp	0
R_F6PA	0
R_NH4tex	5.26579
R_3OAS181	0.00311786
R_3OAS180	0.00207858
R_GPDDA5pp	0
R_ACALDtex	0
R_GMPS2	0.126582
R_EX_no2_e	0
R_MMETtex	0
R_TSULDHpp2	0
R_FACOAL100t2pp	0
R_G3PSabcpp	0
R_SALCHS1H	0
R_AGPAT181	0.00155893
R_AGPAT180	0.00103929
R_ECAP3pp	0
R_EX_chol_e	0
R_MLTP2	0
R_DURIK1	0
R_PRMICI	0.0320832
R_UDPGD	0
R_CPGNUtex	0
R_EX_dgmp_e	0
R_NTPP1	0
R_AGPAT161	0.00207858
R_AGPAT160	0.039493
R_MAN6PI	-0.0111933
R_GMHEPPA	0.00179092
R_ODECOAI	0
R_OAO5t3ex	0
R_EX_phe_L_e	0
R_AM3PA	0
R_GALBDtex	0
R_APRAUR	0
R_EX_crn_e	0
R_OAP9pp	0
R_GALCTNLtex	0
R_FEROXEFEtex	0
R_EX_ag_e	0
R_SPMDAT2	0
R_ASCBtex	0
R_FEOXAMUtex	0
R_SALCHS4FEtonex	0
R_ASPtex	0
R_ICITtex	0
R_PROtex	0
R_THIORDXi	0
R_4PCP	0
R_DHORTS	-0.18117
R_PAPA141	0
R_3HAD80	0.105576
R_ACGAL1PPpp	0
R_HEX1	0
R_EX_ac_e	0
R_HEX7	0
R_HEX4	0
R_SERt2rpp	-1000
R_FDH5pp	0
R_PLIPA2G181pp	0
R_23PDE9pp	0
R_OCDCEAtexi	0
R_MALDt2_2pp	0
R_OAP14pp	0
R_RNTR4c	0.0124891
R_MALTTTRtexi	0
R_SUCCt3pp	0
R_ACGAM1Ptex	0
R_G3PD2	-0.0617101
R_EX_cys_L_e	0
R_CDPMEK	0
R_URIt2rpp	-1000
R_LPLIPAL1A180pp	0
R_2HH24DDH	0
R_EX_cit_e	0
R_EX_dmso_e	0
R_PG180abcpp	0.000214069
R_CLPNH141pp	0
R_3OAR120	0.0983009
R_3OAR121	0.00727502
R_TMDK1	0
R_EX_all_D_e	0
R_EX_4hoxpacd_e	0
R_MN2tpp	0.001509
R_GAPD	8.36964
R_NADH9	0
R_DKDID	0
R_ARGSL	0.062503
R_COAPPALDH	0
R_FE3HOXUtpp	0
R_CBMKr	0.243673
R_LPLIPAL2ATE160	0
R_LPLIPAL2ATE161	0
R_PYK	0.452074
R_EX_acolipa_e	0
R_GLYOX	0
R_ACGK	0.082572
R_PGAMT	-0.0481092
R_EX_fe3hox_un_e	0
R_ACGS	0.082572
R_3OAS80	0.105576
R_MALDtex	0
R_FECRMexs	0
R_PGSA120	0
R_pe2_ST	0.000365782
R_EX_udpg_e	0
R_CYTBD2pp	0
R_FORtppi	0.410118
R_G1PPpp	0
R_ARBTNR3	0
R_ARBTNR2	0
R_ARBTNR1	0
R_LTHRK	0
R_EX_orn_e	0
R_ADNt2pp	1000
R_EX_feoxam_e	0
R_MACPD	0
R_FDH4pp	0.410118
R_FACOAE100	0
R_URIH	0
R_TUNGStex	0
R_DSBGGT	0
R_12PPDRDH	0
R_ASNTRS	0
R_DTMPK	0.0124891
R_DXYLUDtpp	0
R_MNtex	0.001509
R_ETHAtex	0
R_SERt4pp	1000
R_DXYLK	0
R_TRE6PP	0
R_PAPA181pp	0.000134749
R_O2tpp	11.6471
R_EX_glyc2p_e	0
R_12DGR181tipp	0
R_DHQS	0.151413
R_GLCS1	0.013129
R_CDPABEQS	0.0111933
R_GLCDpp	0
R_EX_colipaOA_e	0
R_DHPPDA2	0
R_LYXI	0
R_FEDHBZS3R2	0
R_FEDHBZS3R3	0
R_FEDHBZS3R1	0
R_PGPP120pp	0
R_MLDCP2App	0
R_LEUtex	0
R_PAPPT3	0.0236069
R_XYLK2	0
R_DAPDC	0.148799
R_CYTK1	0.0482748
R_CYTK2	0
R_FMNRx2	0
R_EX_hacolipa_e	0
R_CMPN	0
R_EX_glyb_e	0
R_EX_4hoxpac_e	0
R_LIPAHT2ex	0
R_EX_for_e	0
R_G3PD6	0
R_G3PD7	0
R_G3PD5	0
R_GLCUR1Ptex	0
R_ACANTHAT	0
R_CU2abcpp	0
R_EX_tsul_e	0
R_FRUURtex	0
R_OAADCS	0
R_EX_SALCHS4_e	0
R_EX_dopa_e	0
R_CYANST	0
R_DBTS	0
R_CHLtex	0
R_THYMt3pp	0
R_ILETRS	0
R_PHEtex	0
R_VALabcpp	0
R_PPPNt2rpp	0
R_ALAALAtex	0
R_PE141abcpp	0
R_EX_fe3dcit_e	0
R_EX_aso3_e	0
R_PROLPPOATPE160	0
R_ARBTNtpp	0
R_CRNCBCT	0
R_XTSNt2rpp	0
R_EX_mnl_e	0
R_4PEPTabcpp	0
R_EX_cbi_e	0
R_PLIPA2A180pp	0
R_FE3HOXUtex	0
R_GLYCLTtex	0
R_EX_remnant1_e	0
R_PMDPHT	0
R_INDOLEtex	0
R_GLUt2rpp	0
R_URIC	0
R_CITt2pp	0
R_TDPGDH	0.011641
R_LEUabcpp	0
R_FTHFD	0.382868
R_IDONtex	0
R_DKGLCNR2y	0
R_DKGLCNR2x	0
R_3HAD121	0.00727502
R_3HAD120	0.0983009
R_LPLIPAL2A161	0
R_LPLIPAL2A160	0
R_METS	0.0502547
R_FEOXAMexs	0
R_FACOAE161	0
R_PGLYCP	0
R_INOSR	0
R_UAAGDS	0.0236069
R_ICDHyr	3.44296
R_PG141abcpp	0
R_REMNANT1tpp	0
R_NI2uabcpp	0
R_PSUDS	0
R_EX_orot_e	0
R_NTRIR3pp	0
R_EX_idon_L_e	0
R_PDX5PS	0
R_FECRMR1	0
R_FECRMR3	0
R_FECRMR2	0
R_PETNT161pp	0
R_FE3HOXR2	0
R_FE3HOXR3	0
R_FE3HOXR1	0
R_PSD120	0
R_TARTRtpp	0
R_MG2tpp	0
R_12PPDStex	0
R_DDPA	0.151413
R_PTA2	0
R_DKGLCNR1	0
R_CLPNH181pp	0
R_GLNtex	0
R_PA141abcpp	0
R_OMBZLM	0
R_MCTP1Bpp	0
R_EX_amp_e	0
R_EX_cysi_L_e	0
R_EX_mn2_e	-0.001509
R_G1PCT	0.0111933
R_EX_feroxE_e	0
R_THRt4pp	1000
R_RNAMtpp	0
R_EX_maltpt_e	0
R_CYTD	0
R_XPPT	0
R_CRNabcpp	0
R_PGCD	1.21906
R_GALCTtex	0
R_R5PP	0
R_TGBPA	0
R_MECDPS	0
R_RNDR3b	0
R_ILEabcpp	0
R_F6Pt6_2pp	0
R_AP4AH	0
R_PGMT	-0.0503809
R_AIRStex	0
R_EX_cytd_e	0
R_FACOAL140t2pp	0
R_DPR	2.81922e-05
R_ETOHt2rpp	0
R_SO3tex	0
R_CRNt7pp	0
R_MALTptspp	0
R_MLDCP1App	0
R_PSSA140	0.00513432
R_PSSA141	0
R_UDCPMT	0.0111933
R_PLIPA2A181pp	0
R_DUMPtex	0
R_UAMAGS	0.0236069
R_TYMtex	0
R_DHBS	0
R_DASYN120	0
R_GLCNt2rpp	0
R_EX_hxan_e	0
R_EX_ppal_e	0
R_GALabcpp	0
R_IPPMIa	-0.0986684
R_IPPMIb	-0.0986684
R_LPLIPAL2G120	0
R_UAGAAT	0.00089546
R_DHBD	0
R_EX_AEP_e	0
R_ARBt3ipp	0
R_LPLIPAL2G181	0
R_OMMBLHX3	0
R_FA120ACPHi	0
R_THZPSN	0
R_GLYBt6pp	0
R_LPLIPAL1A141pp	0
R_DAGK180	0
R_DAGK181	0
R_EX_pppn_e	0
R_EX_pydxn_e	0
R_MME	0
R_ALLTAMH	0
R_PLIPA1A180pp	0
R_SERAT	0.0582871
R_3OAR80	0.105576
R_GLYOX3	0
R_NTD12pp	0
R_ADK1	0
R_ADK3	0.998162
R_ADK4	0
R_DHBSZ3FEtonex	0
R_GTHOXtex	0
R_TARTRtex	0
R_ACGALtex	0
R_HYPOE	0
R_PPTtex	0
R_MN6PP	0
R_ENTERH	0
R_CYNTtex	0
R_EX_g6p_e	0
R_MDDEP2pp	0
R_ACS	0
R_PLIPA2G141pp	0
R_EX_cmp_e	0
R_EX_ascb_L_e	0
R_FUMt2_2pp	0
R_EX_3gmp_e	0
R_HACD8i	0
R_DDPGALA	0
R_LIPAHTex	0
R_EX_4abut_e	0
R_EX_galur_e	0
R_EX_ocdcea_e	0
R_3PEPTtex	0
R_PGPP160	0.00813464
R_PGPP161	0.000428139
R_ARGORNt7pp	0
R_CYTDH	0
R_DALAt2pp	0
R_ISETACtex	0
R_EX_glcur_e	0
R_EX_LalaDgluMdapDala_e	0
R_FACOAL60t2pp	0
R_G3PCtex	0
R_CYSTRS	0
R_GLUSy	0
R_NTD3pp	0
R_GALCTt2rpp	0
R_PGPP181	0.000321104
R_UDCPRT	0.0111933
R_HISTP	0.0320832
R_GALKr	0
R_FORtex	0
R_APPK	0
R_HISTD	0.0320832
R_GLCRD	0
R_OPHHX	0
R_FECRMUtex	0
R_TRDR	0.0582871
R_GLYCAtex	0
R_Ec_biomass_iAF1260_core_59p81M	0
R_MDDCP3pp	0
R_EX_no_e	0
R_EX_dca_e	0
R_DASYN180	0.000947544
R_AMALT1	0
R_AMALT2	0
R_AMALT3	0
R_AMALT4	0
R_SERtex	0
R_PG140abcpp	0.00149849
R_PGP120abcpp	0
R_EX_colipa20Oag_e	0
R_HEMEOS	0
R_GALCTNtex	0
R_HPYRRx	1000
R_HPYRRy	0
R_GUI2	0
R_EX_pep_e	0
R_HYXNtpp	0
R_UGLT	0
R_EX_g3pg_e	0
R_EX_mobd_e	-0.001509
R_SPMDabcpp	0
R_H2Otpp	-24.7048
R_XTSNtex	0
R_PPM2	0
R_AOXSr	0
R_G1PACT	0.0481092
R_EX_acac_e	0
R_GBBTNtex	0
R_PHEMEtiex	0
R_URAt2pp	0
R_EX_mso3_e	0
R_LPLIPAL2ATG140	0
R_LPLIPAL2ATG141	0
R_PGSA180	0.000214069
R_PGSA181	0.000321104
R_TTONtex	0
R_UAGDP	0.0481092
R_SHSL1	0.0500416
R_EX_tym_e	0
R_TETtex	0
R_EX_drib_e	0
R_AGPAT141	0
R_AGPAT140	0.00727502
R_EX_ala_D_e	0
R_PSP_L	1.21906
R_MCPST	0
R_SUCOAS	-2.74877
R_SPMDAT1	0
R_MDDEP3pp	0
R_LPLIPAL1E161pp	0
R_RNDR2b	0
R_PPCK	0
R_AHCYSNS	0.000213114
R_ps2_ST	0
R_THD2pp	0
R_METSOX1abcpp	0
R_SLCYSS	0
R_UACGAMPpp	0
R_HISTRS	0
R_TDPADGAT	0
R_GLCTR3	0.00044773
R_GLCTR2	0.00044773
R_GLCTR1	0.00044773
R_SHCHD2	0.000106557
R_TARTRDtpp	0
R_PAPA120	0
R_NFLGLNH	0
R_DM_5DRIB	0
R_UDPGALtex	0
R_TSULtex	0
R_MG2tex	0.0037725
R_NTD4pp	0
R_ALAGLUE	0
R_FACOAL181t2pp	0
R_ASPT	0
R_3OAS141	0.00727502
R_3OAS140	0.0978532
R_LPLIPAL1E180pp	0
R_RMK	0
R_RMI	0
R_NO3R2pp	0
R_DCYTD	0
R_AGDC	0
R_RNMK	0
R_MTRPOX	0
R_ACNML	0
R_TMK	0
R_OCTAtex	0
R_NACODA	0
R_TDSK	0.00044773
R_3OAS121	0.00727502
R_CFAS160E	0
R_3OAR140	0.0978532
R_3OAR141	0.00727502
R_DDGLCNtex	0
R_GLUt4pp	0
R_DINStex	0
R_XANtpp	0
R_DADNt2pp	0
R_GLYCL	0
R_GLYCK	0
R_GLYtex	0
R_EX_ala_L_e	0
R_TAG1PK	0
R_LPLIPAL2ATE140	0
R_LPLIPAL2ATE141	0
R_EX_pser_L_e	0
R_MALTTRtexi	0
R_DHQTi	0.151413
R_DNTPPA	0.0238917
R_PG181abcpp	0.000321104
R_FCLT	0
R_FE2abcpp	0
R_TDECOAI	0
R_3HAD40	0.105576
R_PGPP180	0.000214069
R_EX_fe3_e	0
R_EX_feroxG_e	0
R_SERTRS	0
R_DMBZIDS	0
R_COBALT2abcpp	0
R_FE2tex	0.00350204
R_EDD	0
R_FCLK	0
R_EDA	0
R_PTRCORNt7pp	0
R_EX_asp_L_e	0
R_EX_glyclt_e	0
R_FACOAE120	0
R_SULabcpp	0.0582871
R_EX_tet_e	0
R_LIPACabcpp	0
R_PPGPPDP	0
R_GLYBt6ex	-1000
R_DGK1	0
R_CHRPL	0
R_EX_tre_e	0
R_MG2uabcpp	0
R_LALDO2x	0
R_ACACtex	0
R_ACGAMK	0
R_GSNt2pp	0
R_EAR160y	0
R_EAR160x	0.0810645
R_ACMAMUT	0
R_OAP6pp	0
R_ACGAMT	0
R_ARBt2rpp	0
R_PRFGS	0.21464
R_CLPNS120pp	0
R_PLIPA2E120pp	0
R_ILEtex	0
R_PPND	0.0192309
R_ALLtex	0
R_GUAPRT	0
R_DDCAt2pp	0
R_GULNLR	0
R_GDPDPK	0
R_Htex	-4.05089
R_GLUDy	-4.09172
R_EX_hom_L_e	0
R_SBTptspp	0
R_PLIPA1A141pp	0
R_OHPHM	0
R_2AGPA180tipp	0
R_FALDtex	0
R_NTRIR2x	0
R_PYRtex	0
R_UROCANH	0
R_PANTS	2.81922e-05
R_UM4PCP	0
R_ACHBS	0.041744
R_CRNCAR	0
R_EX_4hthr_e	0
R_UDCPAT	0.0111933
R_G5SD	0.122789
R_PYDXtex	0
R_ANS	0.0419954
R_3NTD4pp	0
R_SO4tex	0.0582871
R_EX_gam_e	0
R_PTRCabcpp	0
R_Cobalt2abcppI	0
R_GLU5K	0.122789
R_4IZ5PPH	0
R_ATPHs	0
R_GSNtex	0
R_DTMPtex	0
R_GLCP	0
R_ICHORT	0
R_DKMPPD	0
R_ICHORS	0
R_EX_malttr_e	0
R_FEROXGtpp	0
R_PROGLYtex	0
R_HACD7i	0
R_MCITL2	0
R_PRASCSi	0.21464
R_IDOND2	0
R_ORNDC	0.020069
R_EX_dgsn_e	0
R_MSO3tex	0
R_GF6PTA	0.0481092
R_TYRtex	0
R_PERD	0
R_MCOATA	0.726544
R_MALTabcpp	0
R_TPI	4.06663
R_EX_SALCHSX_e	0
R_MUREINLPPTP	0
R_EX_mg2_e	-0.0037725
R_NMNAT	0
R_LPLIPAL2A141	0
R_LPLIPAL2A140	0
R_DMSOtex	0
R_NTPTP2	0
R_EAR60y	0
R_EAR60x	0.105576
R_OAP7pp	0
R_NAt3_1p5pp	0
R_OAP13pp	0
R_2AGPE161tipp	0
R_2AGPE180tipp	0
R_TYRTA	-0.0192309
R_EX_tag_D_e	0
R_ASAD	-0.431353
R_DM_HMFURN	0.000213114
R_AMAOTr	0
R_GMHEPAT	0.00179092
R_VALtex	0
R_UGLCURPpp	0
R_LCARR	0
R_LCARS	0
R_PYDXK	0
R_PLIPA2E180pp	0
R_G3PAT120	0
R_AGM4PCP	0
R_MPTG	0.0118034
R_TUNGSabcpp	0
R_CLPNS161pp	1.33793e-05
R_CHLabcpp	0
R_GLYCTO2	0.0238917
R_GLYCTO3	0
R_GLYCTO4	0
R_3CMPtex	0
R_MLTGY1pp	0
R_RNDR1	0
R_GLCabcpp	0
R_METabcpp	0
R_OMPHHX3	0
R_CODSCL5DA	0
R_DSBAO1	0
R_DSBAO2	0
R_CODSCL6ARED	0
R_UDCPPtppi	0.0111933
R_SUCCt2_3pp	0
R_FEOXAMUtpp	0
R_EX_hg2_e	0
R_ACOAD8f	0
R_EX_feroxGfe_e	0
R_EX_manglyc_e	0
R_CYSSADS	0
R_CLPNS160pp	0.000254208
R_5DOAN	0
R_EX_icit_e	0
R_TDPAGTA	0
R_PSSA160	0.027872
R_PSSA161	0.00146695
R_OMMBLHX	0
R_DMQMT	0
R_INOSTtpp	0
R_UDCPDPpp	0.0111933
R_G3PStex	0
R_ACt2rpp	0
R_AGM4PApp	0
R_EX_dcyt_e	0
R_GUI1	0
R_BSORx	0
R_BSORy	0
R_ARGDA	0
R_ARGDC	0
R_EX_g3pi_e	0
R_THRt2pp	0
R_MALTPTabcpp	0
R_NMNR	0
R_SPMDtex	0
R_DSERt2pp	0
R_AST	0
R_TRPS3	0.0419954
R_TRPS2	0.0419954
R_TRPS1	0
R_EX_g3pc_e	0
R_IMPtex	0
R_AMANAPEr	0
R_PLIPA1G141pp	0
R_23PDE4pp	0
R_BUTSO3tex	0
R_NACtex	0
R_12DGR141tipp	0
R_EX_g3pe_e	0
R_4PCPpp	0
R_THMDt2rpp	-1000
R_L_LACtex	0
R_EX_so3_e	0
R_DSERtex	0
R_NADDP	0
R_2AGPA120tipp	0
R_EX_2pg_e	0
R_DAGK140	0
R_DAGK141	0
R_OAAt2_2pp	0
R_XMPtex	0
R_G3PEtex	0
R_CBL1tonex	0
R_EX_cu_e	0
R_ANHGMtex	0
R_RBK_L1	0
R_NADTRHD	0
R_AB6PGH	0
R_EX_hdcea_e	0
R_MLDEP1pp	0
R_2DGLCNRy	0
R_2DGLCNRx	0
R_GLYALDtex	0
R_CODSCL4MT	0
R_HISt2rpp	0
R_EX_ser_D_e	0
R_LGTHL	0
R_GAMAN6Ptex	0
R_EX_colipa_e	0
R_EX_cyan_e	0
R_12PPDRtex	0
R_METSOX2tex	0
R_HACD6i	0
R_12DGR140tipp	0
R_EX_cgly_e	0
R_CYTBO3_4pp	23.2942
R_SERASr	0
R_DB4PS	0
R_ADPRDP	0
R_2AGPG120tipp	0
R_DHBSH	0
R_ACOAD7f	0
R_26DAHtex	0
R_RHAT1	0.00044773
R_UMPK	0.216418
R_12DGR180tipp	0
R_EAR161x	0.00727502
R_EAR161y	0
R_DDGLK	0
R_FOAMtrpp	0
R_EX_salchs2fe_e	0
R_GLYC2Ptex	0
R_NTRIR4pp	0
R_NNDMBRT	0
R_GTPtex	0
R_DATPHs	0
R_ECA4COLIPAtex	0
R_NOtpp	0
R_12DGR161tipp	0
R_EX_34dhpac_e	0
R_SO2tpp	0
R_MTHFR2	0.0741464
R_ANPRT	0.0419954
R_CYSDS	0
R_MDDEP4pp	0
R_GPDDA5	0
R_GPDDA4	0
R_GPDDA3	0
R_GPDDA2	0
R_GPDDA1	0
R_HOMt2pp	0
R_FE3tex	0
R_Kt3pp	0
R_METAT	0.00355795
R_AGM4PH	0
R_CYSItex	0
R_NTPP6	0
R_NTPP7	0
R_NPHS	0
R_EX_fruur_e	0
R_NTPP2	0
R_NTPP3	0
R_AGM4PA	0
R_PRAGSr	0.21464
R_UPPRT	0
R_THDPS	0.172406
R_EX_xyl_D_e	0
R_CSNtex	0
R_Cobalt2abcppII	-999.998
R_LCTStex	0
R_EX_dad_2_e	0
R_LYSt2pp	0
R_AGM3PApp	0
R_ACONTb	3.44296
R_ACONTa	3.44296
R_LPLIPAL1G141pp	0
R_LPLIPAL2ATG160	0
R_LPLIPAL2ATG161	0
R_EX_glcn_e	0
R_CADVtpp	0
R_LPLIPAL2E120	0
R_GTPCI	0.0238917
R_EX_fuc_L_e	0
R_MALTTTRabcpp	0
R_LADGMDH	0
R_AAMYL	0
R_AGPAT120	0
R_CA2tex	0.0022635
R_EX_pi_e	-0.423754
R_PGSA140	0.00149849
R_PGSA141	0
R_EX_tyrp_e	0
R_GULNLtex	0
R_G6PP	0
R_FACOAL120t2pp	0
R_FE3HOXtonex	0
R_RNDR4b	0
R_NTP5	0
R_COBALT2tpp	1000
R_EX_acmana_e	0
R_NTP1	0
R_EX_lipa_e	0
R_4hoxpactex	0
R_EX_malthx_e	0
R_3UMPtex	0
R_PACALDt2rpp	0
R_PEPt6pp	0
R_DINSt2pp	0
R_NAtex	0
R_DNMPPA	0.0238917
R_PUNP5	0
R_FA141ACPHi	0
R_ARGTRS	0
R_PUNP4	0
R_PUNP6	0
R_UREAtex	0
R_EX_xtsn_e	0
R_AMPMS2	0
R_FACOAL161t2pp	0
R_TRPTRS	0
R_EX_26dap_M_e	0
R_23CAMPtex	0
R_PPA2	0
R_ASNabcpp	0
R_PAPSR	0.0582871
R_UDPGPpp	0
R_MELIBtex	0
R_FA100ACPHi	0
R_3OAS161	0.00727502
R_HMBS	0.000106557
R_2MAHMP	0
R_GALtex	0
R_CTBTabcpp	0
R_14GLUCANabcpp	0
R_UPP3MT	0.000106557
R_LYSabcpp	0
R_EX_glyc3p_e	0
R_NO3R2bpp	0
R_2AGPA160tipp	0
R_AADDFT	0
R_MNLtex	0
R_AKGt2rpp	0
R_3OAR160	0.0810645
R_3OAR161	0.00727502
R_udcdp20OagLpp	0
R_EX_gln_L_e	0
R_GLYAT	0
R_biomass_iRR1083	0
R_POX	0
R_LEUTRS	0
R_EX_ocdca_e	0
R_HISNH4L	0
R_GLYTRS	0
R_CGLYtex	0
R_GAMtex	0
R_LDH_D2	0
R_3HAD60	0.105576
R_LPLIPAL1G140pp	0
R_CSND	0
R_NTP10	0
R_K2L4Atex	0
R_UM3PL	0
R_PLIPA2E160pp	0
R_GTHRDtex	0
R_SUCDi	2.97252
R_GLCNtex	0
R_TTDCAt2pp	0
R_VALt2rpp	0
R_ECA4OALpp	0
R_CHITOBex	0
R_DDCAtexi	0
R_HPPPNtex	0
R_DGSNtex	0
R_HMPK1	0
R_MTRK	0.00334484
R_FADRx	0
R_GALCTD	0
R_EX_acgam_e	0
R_EX_ptrc_e	0
R_TREHpp	0
R_SALCHS4FER3	0
R_THRabcpp	0
R_SALCHS4FER1	0
R_PGP161abcpp	0
R_NTD6	0
R_PYRt2rpp	0
R_CO2tpp	-11.106
R_PLIPA1E161pp	0
R_GLYCK2	0
R_ALATA_L2	0
R_EX_tcb_e	0
R_N2Otex	0
R_SOTA	0
R_RMNtpp	0
R_EX_h2o2_e	0
R_ZNabcpp	0
R_LPLIPAL2ATE180	0
R_LPLIPAL2ATE181	0
R_PFOR	0.0522788
R_SDPTA	-0.172406
R_FADRx2	0
R_PLIPA2G160pp	0
R_2AGPG181tipp	0
R_THMabcpp	0
R_PLIPA1A160pp	0
R_EX_pydx_e	0
R_Ktex	0.0848633
R_DAMPtex	0
R_LYXt2pp	0
R_AGMt2pp	0
R_FEENTERR1	0
R_FUMtex	0
R_FEENTERR2	0
R_GCALDD	0.0238917
R_EX_acgal1p_e	0
R_EX_cobalt2_e	-0.001509
R_GTHS	0
R_EX_ethso3_e	0
R_EAR140y	0
R_EAR140x	0.0960622
R_OAP4pp	0
R_EX_din_e	0
R_EX_fum_e	0
R_MOBDabcpp	0.001509
R_PTHRpp	0
R_CDAPPA120	0
R_PHEMEabcpp	0
R_T2DECAI	0.00727502
R_EX_dha_e	0
R_PAPA180pp	8.98327e-05
R_CBItonex	0
R_FECRMUtpp	0
R_EX_metsox_S_L_e	0
R_MNt2pp	0
R_ADOCBIK	0
R_MLTG1	0
R_MLTG2	0
R_MLTG3	0
R_MLTG4	0
R_MLTG5	0
R_GLUabcpp	0
R_NO2tex	0
R_SHCHCS2	0
R_HACD5i	0
R_EX_pro_L_e	0
R_EX_thymd_e	0
R_PLIPA2E161pp	0
R_PLIPA2A160pp	0
R_2AGPG160tipp	0
R_TYRPpp	0
R_ULA4Ntppi	0
R_PA120abcpp	0
R_CYSIabcpp	0
R_OACT	0.0111933
R_EX_feroxEfe_e	0
R_CSNt2pp	0
R_OAO5t3pp	0.0111933
R_RBK	0
R_DAPabcpp	0
R_FE3HOXabcpp	0
R_ALR2	0
R_DM_4HBA	0
R_URIK2	0
R_GLTPD	0
R_PLIPA2A120pp	0
R_UPPDC1	0
R_FLAVNADR	0
R_PPPGO3	0
R_EX_cbl1_e	0
R_NTPP8	0
R_EX_acmum_e	0
R_NTPP9	0
R_PLIPA1E160pp	0
R_3HAD181	0.00311786
R_3HAD180	0.00207858
R_AAMYLpp	0
R_NTPP4	0
R_CBPS	0
R_NTPP5	0
R_PYDAMK	0
R_MOAT2	0.00044773
R_ORPT	-0.18117
R_BUTtex	0
R_EX_tmao_e	0
R_TMAtex	0
R_GLYALDtpp	0
R_3OAR181	0.00311786
R_MDH	3.39239
R_PLIPA2G161pp	0
R_KAS14	0.105576
R_KAS15	0
R_ZN2t3pp	0
R_G3PAT141	0
R_G3PAT140	0.00727502
R_RPI	-0.757528
R_OBTFL	0
R_LPLIPAL1E160pp	0
R_IPPS	0.0986684
R_GALM2pp	0
R_4HTHRtex	0
R_ALCD19	0
R_G3PIabcpp	0
R_EX_glcr_e	0
R_2AGPG140tipp	0
R_PLIPA1G140pp	0
R_METDtex	0
R_EAR40y	0
R_EAR40x	0.105576
R_OAP5pp	0
R_OAP11pp	0
R_MN2abcpp	0
R_EX_ade_e	0
R_ILEt2rpp	0
R_PSSA180	0.000733475
R_PSSA181	0.00110021
R_IG3PS	0.0320832
R_DMATT	0
R_ADNK1	0.00355795
R_G1SAT	0.000852455
R_EX_5dglcn_e	0
R_PYDXPP	0
R_SULRi	0
R_MANtex	0
R_TYRTRS	0
R_XANtex	0
R_ADEtex	0
R_5DGLCNtex	0
R_G6Pt6_2pp	0
R_G3PGtex	0
R_RBFSb	0
R_TCYNTtex	0
R_INSt2rpp	-1000
R_2HH24DDH1	0
R_EX_udpgal_e	0
R_NADH5	0
R_GLNabcpp	0
R_DRIBtex	0
R_DAGK160	0
R_DAGK161	0
R_GMAND	0
R_DADA	0
R_LYSt3pp	0
R_DADK	0
R_ALAALAD	0
R_EX_dtmp_e	0
R_TAGtex	0
R_ALAALAr	0.0236069
R_GLUPRT	0.21464
R_EX_psclys_e	0
R_NI2tex	0
R_SO2tex	0
R_EX_gam6p_e	0
R_2AGPEAT120	0
R_35PDE	0
R_HCINNMtex	0
R_CMPtex	0
R_EX_imp_e	0
R_OAADC	0
R_2AGPG141tipp	0
R_AGM3PA	0
R_MTAN	0.00334484
R_CO2tex	-11.5161
R_DASYN181	0.00142132
R_ICHORSi	0
R_AGM3PH	0
R_EX_tartr_L_e	0
R_HACD4i	0
R_LPLIPAL2G180	0
R_EX_adn_e	0
R_CYTDt2pp	1000
R_EX_galt_e	0
R_CYSTL	0.0500416
R_Zn2tex	0.001509
R_EX_gdp_e	0
R_GLCATr	0
R_L_LACD3	0
R_Kt2pp	0.0848633
R_LPLIPAL1A140pp	0
R_PLIPA2G120pp	0
R_KDOPP	0.00134319
R_PRAIi	0.0419954
R_KDOPS	0.00134319
R_O2Stex	0
R_ACALDtpp	0
R_EX_tton_e	0
R_EX_mal_L_e	0
R_PLIPA2A161pp	0
R_GDPtex	0
R_TRPt2rpp	0
R_PAPA161pp	0.000179665
R_NNDPR	0.00130449
R_EX_2ddglcn_e	0
R_PRAIS	0.21464
R_TREH	0
R_NO3R1pp	0
R_GLYCtex	0
R_DAPAL	0
R_ALDD2y	0
R_ALATA_L	-0.428431
R_UACGAMtex	0
R_PETNT181pp	0
R_IPMD	0.0986684
R_ASNN	0
R_NMNt7pp	0
R_CD2tpp	0
R_METOX2s	0
R_SALCHS4Hpp	0
R_CLtex	0.0022635
R_EX_fecrm_e	0
R_EX_nh4_e	-5.26579
R_AIRSK	0
R_PACALDtex	0
R_EX_feroxBfe_e	0
R_SPMS	0.00334484
R_HBZOPT	0
R_OA4L_ST	0
R_EX_udpacgal_e	0
R_EX_acald_e	0
R_INSK	0
R_INSH	0
R_TTDCEAtexi	0
R_CAT	0
R_MINOHPtexi	0
R_MPTG2	0
R_CU2tpp	0.001509
R_EAR141x	0.00727502
R_EAR141y	0
R_PGSA160	0.00813464
R_PGSA161	0.000428139
R_NMNDA	0
R_3PEPTabcpp	0
R_4HTHRtrpp	0
R_UDPGALPpp	0
R_OROTtex	0
R_RNAMtex	0
R_SERD_D	0
R_SERD_L	0
R_EX_guln_L_e	0
R_EX_arbtn_e	0
R_UDPGtex	0
R_UDCPDPS	0
R_MALtex	0
R_EX_k_e	-0.0848633
R_PYDXNtex	0
R_D5KGK	0
R_CYSLDS	0
R_MOBDtex	0.001509
R_TETDHpp2	0
R_TETDHpp3	0
R_TETDHpp1	0
R_EX_fe3dhbzs_e	0
R_MDDCP1pp	0
R_MN2t3pp	0
R_NTD8	0
R_NTD1	0
R_12PPDRtpp	0
R_ACSERtex	0
R_NTD2	0
R_NTD5	0
R_NTD4	0
R_NTD7	0
R_2AGPE181tipp	0
R_ALAR	0.0472138
R_ASPt2_3pp	0
R_3OAS100	0.105576
R_PAPA160pp	0.00341364
R_EX_fe3hox_e	0
[truncated: 548 more rows]

## Sheet: PSL_clusters
Switch	Av. WT flux	Av. WT flux per Active	Av. KO flux	Av. KO flux per Active	ATP prod. ratio	React. type	Module reaction	WT flux	KO flux	Degree Cen.
R_KAS14	133.357	285.765	133.355	250.041	1	Switch	R_KAS14	0.105576	0	0.571429
						Backup	R_KAS15	0	0.105576	0.571429
						Non-coessential	R_GLYCLTt4pp	0	1000	0.285714
						Non-coessential	R_GRXR	0	0.0582871	0.142857
						Non-coessential	R_PAPSR2	0	0.0582871	0.571429
						Non-coessential	R_GTHOr	0	0.0582871	0.571429
						Non-coessential	R_GLYCTO2	0.0238917	0	0.214286
						Non-coessential	R_GLYCTO3	0	0.0238917	0.285714
						Non-coessential	R_ACOATA	0.105576	0	0.142857
						Non-coessential	R_GLYCLTt2rpp	0	-1000	0.714286
						Non-coessential	R_SERt4pp	1000	0	0.142857
						Non-coessential	R_SERt2rpp	-1000	0	0.571429
						Non-coessential	R_TRDR	0.0582871	0	0.5
						Non-coessential	R_PAPSR	0.0582871	0	0.5
						Non-coessential	R_FRD2	0	0.0238917	0.0714286
R_MTHFC	156.353	277.961	93.8392	214.49	0.971004	Switch	R_MTHFC	0.84423	0	0.633333
						Backup	R_GART	0	0.45262	0.633333
						Non-coessential	R_KAS14	0.105576	0	0.566667
						Non-coessential	R_KAS15	0	0.103575	0.6
						Non-coessential	R_ACt2rpp	0	-1000	0.566667
						Non-coessential	R_FTHFD	0.382868	0	0.666667
						Non-coessential	R_CRNDt2rpp	1000	0	0.566667
						Non-coessential	R_GTHOr	0	0.0571826	0.6
						Non-coessential	R_ACALD	0	0.828232	0.633333
						Non-coessential	R_SERt4pp	1000	0	0.133333
						Non-coessential	R_TRPS3	0.0419954	0	0.0666667
						Non-coessential	R_ASPO5	0.00130449	0	0.566667
						Non-coessential	R_GRXR	0	0.0571826	0.0666667
						Non-coessential	R_MTHFD	0.84423	0	0.1
						Non-coessential	R_THRAi	0	0.828232	0.0333333
						Non-coessential	R_ACt4pp	0	1000	0.0666667
						Non-coessential	R_PAPSR	0.0582871	0	0.533333
						Non-coessential	R_PAPSR2	0	0.0571826	0.566667
						Non-coessential	R_CRNt8pp	1000	0	0.0666667
						Non-coessential	R_CRNt2rpp	-1000	0	0.566667
						Non-coessential	R_ACOATA	0.105576	0	0.133333
						Non-coessential	R_FDH4pp	0.410118	0	0.6
						Non-coessential	R_SERt2rpp	-1000	0	0.633333
						Non-coessential	R_PFL	0	0.425885	0.233333
						Non-coessential	R_ASPO4	0	0.00127977	0.566667
						Non-coessential	R_TRDR	0.0582871	0	0.566667
						Non-coessential	R_ADK1	0	1000	0.0333333
						Non-coessential	R_CLPNS181pp	1.00345e-05	0	N/A
						Non-coessential	R_FRD2	0	0.00127977	0.0666667
						Non-coessential	R_TRPS2	0.0419954	0	0.2
						Non-coessential	R_TRPS1	0	0.0411996	0.2
						Non-coessential	R_FORtppi	0.410118	0	0.133333
R_GLYCtpp	193.094	386.188	116.955	233.909	1.00003	Switch	R_GLYCtpp	-0.000331139	0	0.0833333
						Backup	R_GLYCtex	0	-0.000331125	0.0833333
						Non-coessential	R_GLYCLTt4pp	0	1000	0.166667
						Non-coessential	R_CRNDt2rpp	1000	0	0.541667
						Non-coessential	R_GTHOr	0	0.0582847	0.541667
						Non-coessential	R_GLYCTO2	0.0238917	0	0.25
						Non-coessential	R_GLYCTO3	0	0.0238907	0.291667
						Non-coessential	R_SERt4pp	1000	0	0.0833333
						Non-coessential	R_GRXR	0	0.0582847	0.0833333
						Non-coessential	R_NADH16pp	19.7065	0	0.583333
						Non-coessential	R_FDH5pp	0	0.410101	0.625
						Non-coessential	R_NADH17pp	0	19.7059	0.625
						Non-coessential	R_PAPSR	0.0582871	0	0.5
						Non-coessential	R_PAPSR2	0	0.0582847	0.541667
						Non-coessential	R_CRNt8pp	1000	0	0.0833333
						Non-coessential	R_CRNt2rpp	-1000	0	0.541667
						Non-coessential	R_GLYCLTt2rpp	0	-1000	0.625
						Non-coessential	R_FDH4pp	0.410118	0	0.583333
						Non-coessential	R_SERt2rpp	-1000	0	0.541667
						Non-coessential	R_DHORD5	0	0.181162	0.208333
						Non-coessential	R_DHORD2	0.18117	0	0.166667
						Non-coessential	R_GLYK	0.000331139	0	0.625
						Non-coessential	R_TRDR	0.0582871	0	0.5
						Non-coessential	R_ADK1	0	1000	0.0416667
						Non-coessential	R_EX_glyc_e	0	0.000331125	N/A
						Non-coessential	R_FRD2	0	20.321	0.166667
R_EAR181x	312.508	555.569	125.011	285.74	0.999991	Switch	R_EAR181x	0.00311786	0	0.733333
						Backup	R_EAR181y	0	0.00311784	0.733333
						Non-coessential	R_ACt2rpp	0	-1000	0.8
						Non-coessential	R_SERt4pp	1000	0	0.133333
						Non-coessential	R_PAPSR	0.0582871	0	0.733333
						Non-coessential	R_GRXR	0	0.0582867	0.133333
						Non-coessential	R_PAPSR2	0	0.0582867	0.8
						Non-coessential	R_CRNt8pp	1000	0	0.133333
						Non-coessential	R_GTHOr	0	0.0582867	0.8
						Non-coessential	R_CRNt2rpp	-1000	0	0.8
						Non-coessential	R_CRNDt2rpp	1000	0	0.8
						Non-coessential	R_SERt2rpp	-1000	0	0.8
						Non-coessential	R_ASPO3	0	0.00130448	0.733333
						Non-coessential	R_ASPO5	0.00130449	0	0.733333
						Non-coessential	R_ACt4pp	0	1000	0.133333
						Non-coessential	R_TRDR	0.0582871	0	0.733333
R_SO3R	454.551	714.294	181.824	500.015	0.999382	Switch	R_SO3R	0.0582871	0	0.7
						Backup	R_SULRi	0	0.0582643	0.7
						Non-coessential	R_GLYCLTt4pp	0	1000	0.2
						Non-coessential	R_CRNt8pp	1000	0	0.2
						Non-coessential	R_CRNt2rpp	-1000	0	0.8
						Non-coessential	R_GLYCLTt2rpp	0	-1000	0.8
						Non-coessential	R_CRNDt2rpp	1000	0	0.8
						Non-coessential	R_SERt2rpp	-1000	0	0.8
						Non-coessential	R_ASPO3	0	0.00130398	0.7
						Non-coessential	R_ASPO5	0.00130449	0	0.7
						Non-coessential	R_SERt4pp	1000	0	0.2
R_PG180abcpp	0.000107034	0.000214069	0.000107034	0.000214069	1	Switch	R_PG180abcpp	0.000214069	0	1
						Backup	R_PGPP180pp	0	0.000214069	1
						Backup	R_PGP180abcpp	0	0.000214069	1
						Non-coessential	R_PGPP180	0.000214069	0	1
R_3OAR160	125.016	277.813	75.0189	136.398	0.994747	Switch	R_3OAR160	0.0810645	0	0.589744
						Backup	R_FACOAE160	0	0.0787215	0.74359
						Backup	R_AACPS3	0	0.0787215	0.25641
						Non-coessential	R_KAS14	0.105576	0	0.641026
						Non-coessential	R_KAS15	0	0.105222	0.589744
						Non-coessential	R_ACt2rpp	0	-1000	0.589744
						Non-coessential	R_THRt4pp	1000	0	0.0512821
						Non-coessential	R_LPLIPAL1A181pp	0	0.00103581	0.692308
						Non-coessential	R_3OAR180	0.00207858	0	0.589744
						Non-coessential	R_FACOAL161t2pp	0	0.0787215	0.692308
						Non-coessential	R_FADRx	0	0.0807931	0.615385
						Non-coessential	R_FACOAE180	0	0.00207162	0.74359
						Non-coessential	R_TRPS3	0.0419954	0	0.0512821
						Non-coessential	R_TRPS2	0.0419954	0	0.25641
						Non-coessential	R_TRPS1	0	0.0418548	0.25641
						Non-coessential	R_EAR160x	0.0810645	0	0.615385
						Non-coessential	R_HDCOAI	0	0.0787215	0.0512821
						Non-coessential	R_LPLIPAL1A161pp	0	0.0393607	0.692308
						Non-coessential	R_3HAD160	0.0810645	0	0.282051
						Non-coessential	R_AACPS6	0	0.00207162	0.25641
						Non-coessential	R_CRNt8pp	1000	0	0.0512821
						Non-coessential	R_3OAS180	0.00207858	0	0.641026
						Non-coessential	R_ACOAD8f	0	-0.00207162	0.102564
						Non-coessential	R_EAR180x	0.00207858	0	0.615385
						Non-coessential	R_CRNt2rpp	-1000	0	0.589744
						Non-coessential	R_ACOATA	0.105576	0	0.25641
						Non-coessential	R_3HAD180	0.00207858	0	0.282051
						Non-coessential	R_CRNDt2rpp	1000	0	0.589744
						Non-coessential	R_PLIPA2A161pp	0	0.0393607	0.666667
						Non-coessential	R_ASPO3	0	0.00130012	0.564103
						Non-coessential	R_GLYC3Pt6pp	0	0.0403965	0.0512821
						Non-coessential	R_ASPO5	0.00130449	0	0.564103
						Non-coessential	R_ACt4pp	0	1000	0.0512821
						Non-coessential	R_FACOAL181t2pp	0	0.00207162	0.692308
						Non-coessential	R_ACOAD7f	0	-0.0787215	0.102564
						Non-coessential	R_ADK1	0	1000	0.102564
						Non-coessential	R_3OAS160	0.0810645	0	0.641026
						Non-coessential	R_THRt2rpp	-1000	0	0.589744
						Non-coessential	R_ODECOAI	0	0.00207162	0.0512821
						Non-coessential	R_PLIPA2A181pp	0	0.00103581	0.666667
R_ASNS2	333.357	500.035	111.127	333.38	0.998166	Switch	R_ASNS2	0.1303	0	0.588235
						Backup	R_ASNS1	0	0.130148	0.705882
						Non-coessential	R_KAS14	0.105576	0	0.647059
						Non-coessential	R_KAS15	0	0.105453	0.647059
						Non-coessential	R_ACt2rpp	0	-1000	0.647059
						Non-coessential	R_CA2t3pp	999.998	0	0.588235
						Non-coessential	R_TRPS3	0.0419954	0	0.117647
						Non-coessential	R_TRPS2	0.0419954	0	0.176471
						Non-coessential	R_TRPS1	0	0.0419464	0.176471
						Non-coessential	R_THRt4pp	1000	0	0.117647
						Non-coessential	R_CRNt8pp	1000	0	0.117647
						Non-coessential	R_THRt2rpp	-1000	0	0.647059
						Non-coessential	R_CRNt2rpp	-1000	0	0.647059
						Non-coessential	R_ACOATA	0.105576	0	0.117647
						Non-coessential	R_CRNDt2rpp	1000	0	0.647059
						Non-coessential	R_ASPO3	0	0.00130296	0.588235
						Non-coessential	R_ASPO5	0.00130449	0	0.588235
						Non-coessential	R_ACt4pp	0	1000	0.117647
R_GLCtex	92.0509	184.102	92.9426	185.885	1	Switch	R_GLCtex	5	0	1
						Backup	R_GLCtexi	0	5	1
						Non-coessential	R_KAS14	0.105576	0	N/A
						Non-coessential	R_KAS15	0	0.105576	N/A
						Non-coessential	R_GLYCLTt4pp	0	1000	N/A
						Non-coessential	R_TRPS3	0.0419954	0	N/A
						Non-coessential	R_TRPS2	0.0419954	0	N/A
						Non-coessential	R_GRXR	0	0.0582871	N/A
						Non-coessential	R_PAPSR2	0	0.0582871	N/A
						Non-coessential	R_ASPO4	0	0.00130449	N/A
						Non-coessential	R_GTHOr	0	0.0582871	N/A
						Non-coessential	R_NADH16pp	19.7065	0	N/A
						Non-coessential	R_PAPSR	0.0582871	0	N/A
						Non-coessential	R_ACOATA	0.105576	0	N/A
						Non-coessential	R_FRD2	0	19.7078	N/A
						Non-coessential	R_SERt4pp	1000	0	N/A
						Non-coessential	R_NADH17pp	0	19.7065	N/A
						Non-coessential	R_SERt2rpp	-1000	0	N/A
						Non-coessential	R_TRDR	0.0582871	0	N/A
						Non-coessential	R_ASPO5	0.00130449	0	N/A
						Non-coessential	R_TRPS1	0	0.0419954	N/A
						Non-coessential	R_GLYCLTt2rpp	0	-1000	N/A
R_3OAR120	46.8973	115.44	15.6419	26.3443	0.99361	Switch	R_3OAR120	0.0983009	0	0.596774
						Backup	R_AACPS7	0	0.00222951	0.274194
						Backup	R_HACD6i	0	0.00222951	0.612903
						Backup	R_ECOAH6	0	-0.00222951	0.322581
						Backup	R_KAT6	0	0.00222951	0.16129
						Backup	R_FACOAE120	0	0.00222951	0.741935
						Non-coessential	R_KAS14	0.105576	0	0.693548
						Non-coessential	R_KAS15	0	0.105145	0.612903
						Non-coessential	R_AGPAT141	0	0.00858303	0.209677
						Non-coessential	R_EAR120x	0.0983009	0	0.612903
						Non-coessential	R_G3PAT141	0	0.00858303	0.241935
						Non-coessential	R_FACOAE160	0	0.0786635	0.758065
						Non-coessential	R_PLIPA2A141pp	0	0.00858303	0.725806
						Non-coessential	R_LPLIPAL1A181pp	0	0.00103505	0.725806
						Non-coessential	R_FACOAE140	0	0.0149365	0.758065
						Non-coessential	R_3OAR180	0.00207858	0	0.596774
						Non-coessential	R_3OAR160	0.0810645	0	0.596774
						Non-coessential	R_FACOAL161t2pp	0	0.0786635	0.709677
						Non-coessential	R_FADRx	0	0.0956701	0.629032
						Non-coessential	R_FACOAE180	0	0.00207009	0.758065
						Non-coessential	R_TRPS3	0.0419954	0	0.0322581
						Non-coessential	R_TRPS2	0.0419954	0	0.290323
						Non-coessential	R_GRXR	0	0.0580492	0.0322581
						Non-coessential	R_EAR160x	0.0810645	0	0.612903
						Non-coessential	R_3HAD120	0.0983009	0	0.306452
						Non-coessential	R_HDCOAI	0	0.0786635	0.0322581
						Non-coessential	R_PAPSR	0.0582871	0	0.580645
						Non-coessential	R_EAR140x	0.0960622	0	0.612903
						Non-coessential	R_ACOAD6f	0	-0.0149365	0.0967742
						Non-coessential	R_3HAD140	0.0960622	0	0.290323
						Non-coessential	R_3HAD160	0.0810645	0	0.306452
						Non-coessential	R_AACPS6	0	0.00207009	0.274194
						Non-coessential	R_GTHOr	0	0.0580492	0.596774
						Non-coessential	R_PAPSR2	0	0.0580492	0.596774
						Non-coessential	R_AACPS3	0	0.0786635	0.274194
						Non-coessential	R_3OAS180	0.00207858	0	0.693548
						Non-coessential	R_AACPS1	0	0.0149365	0.274194
						Non-coessential	R_CRNt8pp	1000	0	0.0322581
						Non-coessential	R_ACOAD8f	0	-0.00207009	0.0806452
						Non-coessential	R_EAR180x	0.00207858	0	0.612903
						Non-coessential	R_CRNt2rpp	-1000	0	0.596774
						Non-coessential	R_LPLIPAL1A161pp	0	0.0393317	0.725806
						Non-coessential	R_ACOATA	0.105576	0	0.306452
						Non-coessential	R_3HAD180	0.00207858	0	0.306452
						Non-coessential	R_CRNDt2rpp	1000	0	0.596774
						Non-coessential	R_PLIPA2A161pp	0	0.0393317	0.693548
						Non-coessential	R_ASPO3	0	0.00129916	0.580645
						Non-coessential	R_3OAS120	0.0983009	0	0.693548
						Non-coessential	R_ASPO5	0.00130449	0	0.580645
						Non-coessential	R_TRDR	0.0582871	0	0.580645
						Non-coessential	R_FACOAL181t2pp	0	0.00207009	0.709677
						Non-coessential	R_ACOAD7f	0	-0.0786635	0.0806452
						Non-coessential	R_TDECOAI	0	0.0171661	0.0483871
						Non-coessential	R_ADK1	0	1000	0.129032
						Non-coessential	R_GLYC3Pt6pp	0	0.0489498	0.0806452
						Non-coessential	R_CLPNS181pp	1.00345e-05	0	N/A
						Non-coessential	R_3OAS160	0.0810645	0	0.693548
						Non-coessential	R_LPLIPAL1A141pp	0	0.00858303	0.741935
						Non-coessential	R_PA141abcpp	0	0.00858303	0.806452
						Non-coessential	R_FACOAL141t2pp	0	0.0171661	0.709677
						Non-coessential	R_ODECOAI	0	0.00207009	0.0322581
						Non-coessential	R_EAR100x	0.0983009	0	0.580645
						Non-coessential	R_PLIPA2A181pp	0	0.00103505	0.693548
						Non-coessential	R_TRPS1	0	0.0418239	0.290323
R_O2tex	83.4862	137.639	50.1146	127.375		Switch	R_O2tex	11.6471	0	0.0392157
						Backup	R_DHORD5	0	0.0199094	0.0588235
						Backup	R_FRD2	0	0.0200528	0.117647
						Backup	R_SUCCtex	0	-0.0200526	0.0784314
						Non-coessential	R_EX_etoh_e	0	4.68299	N/A
						Non-coessential	R_KAS14	0.105576	0	0.607843
						Non-coessential	R_ACt2rpp	0	-1000	0.568627
						Non-coessential	R_EX_o2_e	-11.6471	0	N/A
						Non-coessential	R_EX_glyclt_e	0	0.00262555	N/A
						Non-coessential	R_FORtex	0	-9.45031	0.0392157
						Non-coessential	R_KAS15	0	0.0116021	0.627451
						Non-coessential	R_CLPNS161pp	1.33793e-05	0	N/A
						Non-coessential	R_PPNCL2	2.81922e-05	0	0.529412
						Non-coessential	R_FDH4pp	0.410118	0	0.686275
						Non-coessential	R_EX_for_e	0	9.45031	N/A
						Non-coessential	R_GLYCTO2	0.0238917	0	0.156863
						Non-coessential	R_ASP1DC	2.81922e-05	0	0.588235
						Non-coessential	R_PGL	1.17123	0	0.588235
						Non-coessential	R_CLPNS140pp	4.68277e-05	0	N/A
						Non-coessential	R_THD2pp	0	0.583941	0.588235
						Non-coessential	R_THRt2rpp	-1000	0	0.54902
						Non-coessential	R_DHORD2	0.18117	0	0.117647
						Non-coessential	R_PANTS	2.81922e-05	0	0.54902
						Non-coessential	R_ACt4pp	0	995.433	0.0588235
						Non-coessential	R_CYTBO3_4pp	23.2942	0	0.666667
						Non-coessential	R_NADH16pp	19.7065	0	0.627451
						Non-coessential	R_MOHMT	2.81922e-05	0	0.0980392
						Non-coessential	R_12dgr2_ST	4.49164e-05	0	0.0196078
						Non-coessential	R_ADK1	0	1000	0.0784314
						Non-coessential	R_MALS	0.0238917	0	0.666667
						Non-coessential	R_AKGDH	2.97122	0	0.294118
						Non-coessential	R_ALCD2x	0	-4.68299	0.588235
						Non-coessential	R_PDH	4.40379	0	0.294118
						Non-coessential	R_THRt4pp	1000	0	0.0392157
						Non-coessential	R_ACtex	0	-4.56744	0.0392157
						Non-coessential	R_CRNt8pp	1000	0	0.0392157
						Non-coessential	R_G6PDH2r	1.17123	0	0.54902
						Non-coessential	R_DPR	2.81922e-05	0	0.568627
						Non-coessential	R_PAPA180pp	8.98327e-05	0	0.0980392
						Non-coessential	R_CRNt2rpp	-1000	0	0.54902
						Non-coessential	R_ACOATA	0.105576	0	0.156863
						Non-coessential	R_GLYCLTt2rpp	0	-0.00262555	0.568627
						Non-coessential	R_CRNDt2rpp	1000	0	0.54902
						Non-coessential	R_ACALD	0	-4.68299	0.607843
						Non-coessential	R_DPCOAK	2.81922e-05	0	0.627451
						Non-coessential	R_PFL	0	9.40524	0.176471
						Non-coessential	R_ASPO4	0	0.000143355	0.568627
						Non-coessential	R_ASPO5	0.00130449	0	0.588235
						Non-coessential	R_ETOHt2rpp	0	-4.68299	0.54902
						Non-coessential	R_ETOHtex	0	-4.68299	0.0392157
						Non-coessential	R_PNTK	2.81922e-05	0	0.54902
						Non-coessential	R_EX_succ_e	0	0.0200526	N/A
						Non-coessential	R_CLPNS181pp	1.00345e-05	0	N/A
						Non-coessential	R_GND	1.17123	0	0.215686
						Non-coessential	R_PTPATi	2.81922e-05	0	0.54902
						Non-coessential	R_SUCCt3pp	0	0.0200526	0.588235
						Non-coessential	R_SUCDi	2.97252	0	0.176471
						Non-coessential	R_O2tpp	11.6471	0	0.0392157
						Non-coessential	R_PPCDC	2.81922e-05	0	0.588235
						Non-coessential	R_EX_ac_e	0	4.56744	N/A
						Non-coessential	R_GLYCLTtex	0	-0.00262555	0.0392157
R_PGPP181	0.00976803	0.0293041	250.015	375.022	1	Switch	R_PGPP181	0.000321104	0	0.272727
						Backup	R_PGPP181pp	0	0.000321104	0.272727
						Backup	R_PGP181abcpp	0	0.000321104	0.818182
						Non-coessential	R_GLYCLTt4pp	0	1000	0.181818
						Non-coessential	R_NAt3pp	0	1000	0.727273
						Non-coessential	R_GRXR	0	0.0582871	0.181818
						Non-coessential	R_PAPSR2	0	0.0582871	0.727273
						Non-coessential	R_GTHOr	0	0.0582871	0.727273
						Non-coessential	R_GLYCLTt2rpp	0	-1000	0.727273
						Non-coessential	R_PG181abcpp	0.000321104	0	0.818182
						Non-coessential	R_PAPSR	0.0582871	0	0.636364
						Non-coessential	R_TRDR	0.0582871	0	0.636364
R_PG160abcpp	0.00406732	0.00813464	0.00406724	0.00813449	0.999974	Switch	R_PG160abcpp	0.00813464	0	1
						Backup	R_PGP160abcpp	0	0.00813449	1
						Backup	R_PGPP160pp	0	0.00813449	1
						Non-coessential	R_PGPP160	0.00813464	0	1
R_PAPA181pp	1.7937	4.93267	3.58576	5.63477	1.00052	Switch	R_PAPA181pp	0.000134749	0	0.333333
						Backup	R_LIPAabcpp	0	0.000134651	0.555556
						Backup	R_PETNT181pp	0	0.000134651	0.333333
						Non-coessential	R_ENLIPAtex	0	0.000134651	0.111111
						Non-coessential	R_NADH16pp	19.7065	0	0.444444
						Non-coessential	R_GLYCTO2	0.0238917	0	0.222222
						Non-coessential	R_GLYCTO4	0	0.0238742	0.333333
						Non-coessential	R_EX_enlipa_e	0	0.000134651	N/A
						Non-coessential	R_FRD3	0	19.7214	0.222222
						Non-coessential	R_PA181abcpp	0.000137616	0	0.444444
						Non-coessential	R_NADH18pp	0	19.6976	0.555556
R_TRPS2	0.0279969	0.0419954	0.0139985	0.0419954	1	Switch	R_TRPS2	0.0419954	0	1
						Backup	R_TRPS1	0	0.0419954	1
						Non-coessential	R_TRPS3	0.0419954	0	1
R_MTHFD	200.11	333.517	100.095	250.238	0.971004	Switch	R_MTHFD	0.84423	0	0.107143
						Backup	R_GART	0	0.45262	0.642857
						Non-coessential	R_KAS14	0.105576	0	0.571429
						Non-coessential	R_KAS15	0	0.103575	0.642857
						Non-coessential	R_FTHFD	0.382868	0	0.678571
						Non-coessential	R_CRNDt2rpp	1000	0	0.571429
						Non-coessential	R_THRt4pp	1000	0	0.107143
						Non-coessential	R_GTHOr	0	0.0571826	0.607143
						Non-coessential	R_GLUt2rpp	0	-1000	0.571429
						Non-coessential	R_THRD	0	0.828232	0.607143
						Non-coessential	R_GLYAT	0	-0.828232	0.142857
						Non-coessential	R_TRPS3	0.0419954	0	0.0714286
						Non-coessential	R_TRPS2	0.0419954	0	0.142857
						Non-coessential	R_GRXR	0	0.0571826	0.0714286
						Non-coessential	R_GLUt4pp	0	1000	0.0714286
						Non-coessential	R_PAPSR	0.0582871	0	0.535714
						Non-coessential	R_PAPSR2	0	0.0571826	0.571429
						Non-coessential	R_CRNt8pp	1000	0	0.0714286
						Non-coessential	R_CRNt2rpp	-1000	0	0.571429
						Non-coessential	R_ACOATA	0.105576	0	0.142857
						Non-coessential	R_FDH4pp	0.410118	0	0.607143
						Non-coessential	R_MTHFC	0.84423	0	0.642857
						Non-coessential	R_PFL	0	0.425885	0.25
						Non-coessential	R_TRDR	0.0582871	0	0.571429
						Non-coessential	R_CA2t3pp	999.998	0	0.535714
						Non-coessential	R_ADK1	0	1000	0.0357143
						Non-coessential	R_CLPNS181pp	1.00345e-05	0	N/A
						Non-coessential	R_THRt2rpp	-1000	0	0.571429
						Non-coessential	R_TRPS1	0	0.0411996	0.142857
						Non-coessential	R_FORtppi	0.410118	0	0.142857
R_EAR121x	0.00363751	0.00727502	0.00363745	0.0072749	0.999974	Switch	R_EAR121x	0.00727502	0	1
						Backup	R_EAR121y	0	0.0072749	1
R_PG140abcpp	111.129	250.041	111.144	200.059	0.999991	Switch	R_PG140abcpp	0.00149849	0	0.529412
						Backup	R_PGP140abcpp	0	0.00149848	0.529412
						Backup	R_PGPP140pp	0	0.00149848	0.176471
						Non-coessential	R_GLYCLTt4pp	0	1000	0.235294
						Non-coessential	R_PAPSR	0.0582871	0	0.411765
						Non-coessential	R_GRXR	0	0.0582869	0.117647
						Non-coessential	R_PAPSR2	0	0.0582869	0.470588
						Non-coessential	R_GTHOr	0	0.0582869	0.470588
						Non-coessential	R_GLYCTO2	0.0238917	0	0.235294
						Non-coessential	R_GLYCTO3	0	0.0238916	0.294118
						Non-coessential	R_GLYCLTt2rpp	0	-1000	0.588235
						Non-coessential	R_SERt4pp	1000	0	0.117647
						Non-coessential	R_SERt2rpp	-1000	0	0.470588
						Non-coessential	R_DHORD5	0	0.181169	0.176471
						Non-coessential	R_DHORD2	0.18117	0	0.117647
						Non-coessential	R_TRDR	0.0582871	0	0.411765
						Non-coessential	R_PGPP140	0.00149849	0	0.176471
						Non-coessential	R_FRD2	0	0.205061	0.117647
R_NDPK1	227.351	384.747	90.983	222.403	1	Switch	R_NDPK1	1.30317	0	1
						Backup	R_ADK1	0	1.30317	1
						Non-coessential	R_KAS14	0.105576	0	N/A
						Non-coessential	R_KAS15	0	0.105576	N/A
						Non-coessential	R_GLYCLTt4pp	0	1000	N/A
						Non-coessential	R_TRPS3	0.0419954	0	N/A
						Non-coessential	R_TRPS2	0.0419954	0	N/A
						Non-coessential	R_GRXR	0	0.0582871	N/A
						Non-coessential	R_PAPSR2	0	0.0582871	N/A
						Non-coessential	R_THRt4pp	1000	0	N/A
						Non-coessential	R_CRNt8pp	1000	0	N/A
						Non-coessential	R_GTHOr	0	0.0582871	N/A
						Non-coessential	R_THRt2rpp	-1000	0	N/A
						Non-coessential	R_CRNt2rpp	-1000	0	N/A
						Non-coessential	R_PAPSR	0.0582871	0	N/A
						Non-coessential	R_ACOATA	0.105576	0	N/A
						Non-coessential	R_GLYCLTt2rpp	0	-1000	N/A
						Non-coessential	R_CRNDt2rpp	1000	0	N/A
						Non-coessential	R_ASPO3	0	0.00130449	N/A
						Non-coessential	R_ASPO5	0.00130449	0	N/A
						Non-coessential	R_TRPS1	0	0.0419954	N/A
						Non-coessential	R_TRDR	0.0582871	0	N/A
R_G5SD	264.219	502.016	160	337.779	0.998269	Switch	R_G5SD	0.122789	0	0.444444
						Backup	R_NACODA	0	0.122654	0.0555556
						Non-coessential	R_GLYCLTt4pp	0	1000	0.222222
						Non-coessential	R_GLYCTO2	0.0238917	0	0.277778
						Non-coessential	R_ADK1	0	1000	0.0555556
						Non-coessential	R_GLU5K	0.122789	0	0.111111
						Non-coessential	R_SERt4pp	1000	0	0.111111
						Non-coessential	R_CRNt8pp	1000	0	0.111111
						Non-coessential	R_SERt2rpp	-1000	0	0.388889
						Non-coessential	R_NADH16pp	19.7065	0	0.444444
						Non-coessential	R_CRNt2rpp	-1000	0	0.388889
						Non-coessential	R_GLYCTO4	0	0.0238654	0.277778
						Non-coessential	R_GLYCLTt2rpp	0	-1000	0.5
						Non-coessential	R_CRNDt2rpp	1000	0	0.388889
						Non-coessential	R_NADH18pp	0	19.7376	0.444444
						Non-coessential	R_FRD3	0	19.7615	0.166667
						Non-coessential	R_DHORD5	0	0.180971	0.111111
						Non-coessential	R_DHORD2	0.18117	0	0.166667
						Non-coessential	R_FRD2	0	0.180971	0.111111
R_3HAD120	69.7433	173.156	42.2473	70.7396	0.99361	Switch	R_3HAD120	0.0983009	0	0.271429
						Backup	R_AACPS7	0	0.00222951	0.214286
						Backup	R_HACD6i	0	0.00222951	0.6
						Backup	R_ECOAH6	0	-0.00222951	0.285714
						Backup	R_KAT6	0	0.00222951	0.114286
						Backup	R_FACOAE120	0	0.00222951	0.7
						Non-coessential	R_PA141abcpp	0	0.00858303	0.771429
						Non-coessential	R_ACt2rpp	0	-1000	0.585714
						Non-coessential	R_EAR120x	0.0983009	0	0.6
						Non-coessential	R_G3PAT141	0	0.00858303	0.185714
						Non-coessential	R_FACOAE160	0	0.0786635	0.714286
						Non-coessential	R_FDH4pp	0.410118	0	0.585714
						Non-coessential	R_THRt4pp	1000	0	0.0285714
						Non-coessential	R_AGPAT141	0	0.00858303	0.157143
						Non-coessential	R_PLIPA2A141pp	0	0.00858303	0.7
						Non-coessential	R_LPLIPAL1A181pp	0	0.00103505	0.7
						Non-coessential	R_FACOAE140	0	0.0149365	0.714286
						Non-coessential	R_3OAR180	0.00207858	0	0.585714
						Non-coessential	R_3OAR160	0.0810645	0	0.585714
						Non-coessential	R_FADRx	0	0.0956701	0.614286
						Non-coessential	R_3OAR120	0.0983009	0	0.585714
						Non-coessential	R_DHORD5	0	0.18043	0.0714286
						Non-coessential	R_FACOAE180	0	0.00207009	0.714286
						Non-coessential	R_TRPS3	0.0419954	0	0.0285714
						Non-coessential	R_DHORD2	0.18117	0	0.0428571
						Non-coessential	R_GRXR	0	0.0580492	0.0285714
						Non-coessential	R_EAR160x	0.0810645	0	0.6
						Non-coessential	R_NADH16pp	19.7065	0	0.585714
						Non-coessential	R_LPLIPAL1A141pp	0	0.00858303	0.714286
						Non-coessential	R_HDCOAI	0	0.0786635	0.0285714
						Non-coessential	R_NADH17pp	0	19.8225	0.6
						Non-coessential	R_PAPSR	0.0582871	0	0.571429
						Non-coessential	R_LPLIPAL1A161pp	0	0.0393317	0.7
						Non-coessential	R_ACOAD6f	0	-0.0149365	0.0857143
						Non-coessential	R_3HAD140	0.0960622	0	0.257143
						Non-coessential	R_3HAD160	0.0810645	0	0.271429
						Non-coessential	R_AACPS6	0	0.00207009	0.214286
						Non-coessential	R_GTHOr	0	0.0580492	0.585714
						Non-coessential	R_PAPSR2	0	0.0580492	0.585714
						Non-coessential	R_AACPS3	0	0.0786635	0.214286
						Non-coessential	R_3OAS180	0.00207858	0	0.657143
						Non-coessential	R_AACPS1	0	0.0149365	0.214286
						Non-coessential	R_CRNt8pp	1000	0	0.0285714
						Non-coessential	R_ACOAD8f	0	-0.00207009	0.0714286
						Non-coessential	R_EAR180x	0.00207858	0	0.6
						Non-coessential	R_CRNt2rpp	-1000	0	0.585714
						Non-coessential	R_3HAD180	0.00207858	0	0.271429
						Non-coessential	R_CRNDt2rpp	1000	0	0.585714
						Non-coessential	R_PLIPA2A161pp	0	0.0393317	0.671429
						Non-coessential	R_FACOAL161t2pp	0	0.0786635	0.671429
						Non-coessential	R_3OAS120	0.0983009	0	0.657143
						Non-coessential	R_ASPO5	0.00130449	0	0.585714
						Non-coessential	R_ACt4pp	0	1000	0.0285714
						Non-coessential	R_FDH5pp	0	0.408444	0.6
						Non-coessential	R_TRDR	0.0582871	0	0.571429
						Non-coessential	R_FACOAL181t2pp	0	0.00207009	0.671429
						Non-coessential	R_ACOAD7f	0	-0.0786635	0.0714286
						Non-coessential	R_TDECOAI	0	0.0171661	0.0428571
						Non-coessential	R_ADK1	0	1000	0.114286
						Non-coessential	R_GLYC3Pt6pp	0	0.0489498	0.0714286
						Non-coessential	R_CLPNS181pp	1.00345e-05	0	N/A
						Non-coessential	R_3OAS160	0.0810645	0	0.657143
						Non-coessential	R_THRt2rpp	-1000	0	0.585714
						Non-coessential	R_EAR140x	0.0960622	0	0.6
						Non-coessential	R_FACOAL141t2pp	0	0.0171661	0.671429
						Non-coessential	R_FRD2	0	20.4126	0.0714286
						Non-coessential	R_TRPS2	0.0419954	0	0.257143
						Non-coessential	R_ODECOAI	0	0.00207009	0.0285714
						Non-coessential	R_EAR100x	0.0983009	0	0.571429
						Non-coessential	R_PLIPA2A181pp	0	0.00103505	0.671429
						Non-coessential	R_TRPS1	0	0.0418239	0.257143
						Non-coessential	R_ASPO4	0	0.00129916	0.6
R_PGPP160	126.26	288.594	127.519	226.7	0.999974	Switch	R_PGPP160	0.00813464	0	0.2
						Backup	R_PGP160abcpp	0	0.00813449	0.6
						Backup	R_PGPP160pp	0	0.00813449	0.2
						Non-coessential	R_GLYCLTt4pp	0	1000	0.266667
						Non-coessential	R_PG160abcpp	0.00813464	0	0.6
						Non-coessential	R_SERt2rpp	-1000	0	0.533333
						Non-coessential	R_NADH16pp	19.7065	0	0.533333
						Non-coessential	R_GLYCTO2	0.0238917	0	0.333333
						Non-coessential	R_GLYCTO4	0	0.0238912	0.333333
						Non-coessential	R_FRD2	0	0.410111	0.133333
						Non-coessential	R_FDH4pp	0.410118	0	0.533333
						Non-coessential	R_SERt4pp	1000	0	0.133333
						Non-coessential	R_NADH18pp	0	19.707	0.6
						Non-coessential	R_FRD3	0	19.7309	0.2
						Non-coessential	R_FDH5pp	0	0.410111	0.533333
						Non-coessential	R_GLYCLTt2rpp	0	-1000	0.666667
R_PGPP161	0.000122325	0.000428139	428.572	600	1	Switch	R_PGPP161	0.000428139	0	0.5
						Backup	R_PGP161abcpp	0	0.000428139	0.833333
						Backup	R_PGPP161pp	0	0.000428139	0.5
						Non-coessential	R_PG161abcpp	0.000428139	0	0.833333
						Non-coessential	R_NAt3pp	0	1000	0.666667
						Non-coessential	R_GLYCLTt4pp	0	1000	0.333333
						Non-coessential	R_GLYCLTt2rpp	0	-1000	0.666667
R_EAR60x	0.052788	0.105576	0.0527755	0.105551	0.999622	Switch	R_EAR60x	0.105576	0	1
						Backup	R_EAR60y	0	0.105551	1
R_PG181abcpp	250	500	250	500	1	Switch	R_PG181abcpp	0.000321104	0	0.714286
						Backup	R_PGPP181pp	0	0.000321104	0.428571
						Backup	R_PGP181abcpp	0	0.000321104	0.714286
						Non-coessential	R_THRt4pp	1000	0	0.285714
						Non-coessential	R_PGPP181	0.000321104	0	0.428571
						Non-coessential	R_GLYCLTt4pp	0	1000	0.285714
						Non-coessential	R_GLYCLTt2rpp	0	-1000	0.571429
						Non-coessential	R_THRt2rpp	-1000	0	0.571429
R_PAPSR	0.0233148	0.0582871	0.0349723	0.0582871	1	Switch	R_PAPSR	0.0582871	0	0.75
						Backup	R_GTHOr	0	0.0582871	1
						Backup	R_GRXR	0	0.0582871	0.5
						Backup	R_PAPSR2	0	0.0582871	1
						Non-coessential	R_TRDR	0.0582871	0	0.75
R_PGPP140	0.000749245	0.00149849	0.00074924	0.00149848	0.999991	Switch	R_PGPP140	0.00149849	0	1
						Backup	R_PGP140abcpp	0	0.00149848	1
						Backup	R_PGPP140pp	0	0.00149848	1
						Non-coessential	R_PG140abcpp	0.00149849	0	1
R_PPC	181.953	400.297	181.958	333.59	0.995198	Switch	R_PPC	1.37072	0	0.666667
						Backup	R_ICL	0	1.36653	N/A
						Non-coessential	R_GLYCLTt4pp	0	1000	0.222222
						Non-coessential	R_GRXR	0	0.0581087	0.222222
						Non-coessential	R_PAPSR2	0	0.0581087	0.777778
						Non-coessential	R_THRt4pp	1000	0	0.222222
						Non-coessential	R_GTHOr	0	0.0581087	0.777778
						Non-coessential	R_THRt2rpp	-1000	0	0.777778
						Non-coessential	R_GLYCLTt2rpp	0	-1000	0.777778
						Non-coessential	R_PAPSR	0.0582871	0	0.666667
						Non-coessential	R_TRDR	0.0582871	0	0.666667
R_3HAD140	122.451	334.7	74.1872	116.987	0.993788	Switch	R_3HAD140	0.0960622	0	0.230769
						Backup	R_FACOAE140	0	0.093611	0.641026
						Backup	R_AACPS1	0	0.093611	0.25641
						Non-coessential	R_PA141abcpp	0	0.0468055	0.717949
						Non-coessential	R_ACt2rpp	0	-1000	0.564103
						Non-coessential	R_G3PAT141	0	0.0468055	0.205128
						Non-coessential	R_FDH4pp	0.410118	0	0.564103
						Non-coessential	R_THRt4pp	1000	0	0.0512821
						Non-coessential	R_AGPAT141	0	0.0468055	0.179487
						Non-coessential	R_PLIPA2A141pp	0	0.0468055	0.641026
						Non-coessential	R_LPLIPAL1A181pp	0	0.00103517	0.641026
						Non-coessential	R_3OAR180	0.00207858	0	0.564103
						Non-coessential	R_FADRx	0	0.0956814	0.589744
						Non-coessential	R_FACOAE180	0	0.00207034	0.641026
						Non-coessential	R_NADH16pp	19.7065	0	0.564103
						Non-coessential	R_LPLIPAL1A141pp	0	0.0468055	0.666667
						Non-coessential	R_NADH17pp	0	19.8187	0.589744
						Non-coessential	R_EAR140x	0.0960622	0	0.589744
						Non-coessential	R_ACOAD6f	0	-0.093611	0.102564
						Non-coessential	R_AACPS6	0	0.00207034	0.25641
						Non-coessential	R_3OAS180	0.00207858	0	0.641026
						Non-coessential	R_CRNt8pp	1000	0	0.0512821
						Non-coessential	R_ACOAD8f	0	-0.00207034	0.102564
						Non-coessential	R_EAR180x	0.00207858	0	0.589744
						Non-coessential	R_CRNt2rpp	-1000	0	0.564103
						Non-coessential	R_3HAD180	0.00207858	0	0.25641
						Non-coessential	R_CRNDt2rpp	1000	0	0.564103
						Non-coessential	R_DHORD5	0	0.180451	0.102564
						Non-coessential	R_DHORD2	0.18117	0	0.0769231
						Non-coessential	R_ACt4pp	0	1000	0.0512821
						Non-coessential	R_FDH5pp	0	0.408492	0.589744
						Non-coessential	R_FACOAL181t2pp	0	0.00207034	0.641026
						Non-coessential	R_TDECOAI	0	0.093611	0.0512821
						Non-coessential	R_ADK1	0	1000	0.128205
						Non-coessential	R_GLYC3Pt6pp	0	0.0478407	0.102564
						Non-coessential	R_CLPNS181pp	1.00345e-05	0	N/A
						Non-coessential	R_THRt2rpp	-1000	0	0.564103
						Non-coessential	R_FACOAL141t2pp	0	0.093611	0.641026
						Non-coessential	R_FRD2	0	20.4077	0.0769231
						Non-coessential	R_ODECOAI	0	0.00207034	0.0512821
						Non-coessential	R_PLIPA2A181pp	0	0.00103517	0.589744
R_CBMKr	350.016	583.361	250.014	625.036	0.993195	Switch	R_CBMKr	0.243673	0	0.555556
						Backup	R_CBPS	0	0.242613	0.722222
						Non-coessential	R_ACt2rpp	0	-1000	0.555556
						Non-coessential	R_SERt4pp	1000	0	0.333333
						Non-coessential	R_THRt2rpp	-1000	0	0.555556
						Non-coessential	R_ADK1	0	1000	0.111111
						Non-coessential	R_TRPS2	0.0419954	0	0.277778
						Non-coessential	R_TRPS1	0	0.0418128	0.277778
						Non-coessential	R_CLPNS181pp	1.00345e-05	0	N/A
						Non-coessential	R_THRt4pp	1000	0	0.222222
						Non-coessential	R_CRNt8pp	1000	0	0.111111
						Non-coessential	R_SERt2rpp	-1000	0	0.666667
						Non-coessential	R_GLUt4pp	0	1000	0.277778
						Non-coessential	R_GLUt2rpp	0	-1000	0.555556
						Non-coessential	R_CRNt2rpp	-1000	0	0.555556
						Non-coessential	R_CRNDt2rpp	1000	0	0.555556
						Non-coessential	R_TRPS3	0.0419954	0	0.111111
						Non-coessential	R_ASPO3	0	0.00129881	0.5
						Non-coessential	R_ASPO5	0.00130449	0	0.5
						Non-coessential	R_ACt4pp	0	1000	0.222222
R_EAR40x	0.052788	0.105576	0.0527755	0.105551	0.999622	Switch	R_EAR40x	0.105576	0	1
						Backup	R_EAR40y	0	0.105551	1
R_3HAD160	128.725	295.31	52.317	92.7437	0.994747	Switch	R_3HAD160	0.0810645	0	0.236842
						Backup	R_FACOAE160	0	0.0787215	0.710526
						Backup	R_AACPS3	0	0.0787215	0.236842
						Non-coessential	R_KAS14	0.105576	0	0.657895
						Non-coessential	R_KAS15	0	0.105222	0.605263
						Non-coessential	R_GLYCLTt4pp	0	1000	0.105263
						Non-coessential	R_LPLIPAL1A181pp	0	0.00103581	0.657895
						Non-coessential	R_3OAR180	0.00207858	0	0.605263
						Non-coessential	R_GLYCTO4	0	0.0238117	0.131579
						Non-coessential	R_SERt2rpp	-1000	0	0.605263
						Non-coessential	R_3OAR160	0.0810645	0	0.605263
						Non-coessential	R_FADRx	0	0.0807931	0.631579
						Non-coessential	R_PLIPA2A161pp	0	0.0393607	0.631579
						Non-coessential	R_EAR160x	0.0810645	0	0.631579
						Non-coessential	R_NADH16pp	19.7065	0	0.605263
						Non-coessential	R_HDCOAI	0	0.0787215	0.0526316
						Non-coessential	R_NADH18pp	0	19.8013	0.631579
						Non-coessential	R_LPLIPAL1A161pp	0	0.0393607	0.657895
						Non-coessential	R_AACPS6	0	0.00207162	0.236842
						Non-coessential	R_CRNt8pp	1000	0	0.0526316
						Non-coessential	R_3OAS180	0.00207858	0	0.657895
						Non-coessential	R_ACOAD8f	0	-0.00207162	0.105263
						Non-coessential	R_EAR180x	0.00207858	0	0.631579
						Non-coessential	R_CRNt2rpp	-1000	0	0.605263
						Non-coessential	R_ACOATA	0.105576	0	0.263158
						Non-coessential	R_GLYCLTt2rpp	0	-1000	0.657895
						Non-coessential	R_CRNDt2rpp	1000	0	0.605263
						Non-coessential	R_FACOAE180	0	0.00207162	0.710526
						Non-coessential	R_FACOAL161t2pp	0	0.0787215	0.684211
						Non-coessential	R_GLYC3Pt6pp	0	0.0403965	0.0526316
						Non-coessential	R_FACOAL181t2pp	0	0.00207162	0.684211
						Non-coessential	R_ACOAD7f	0	-0.0787215	0.105263
						Non-coessential	R_SERt4pp	1000	0	0.0526316
						Non-coessential	R_GLYCTO2	0.0238917	0	0.105263
						Non-coessential	R_3OAS160	0.0810645	0	0.657895
						Non-coessential	R_FRD3	0	19.8251	0.0526316
						Non-coessential	R_ODECOAI	0	0.00207162	0.0526316
						Non-coessential	R_PLIPA2A181pp	0	0.00103581	0.631579
						Non-coessential	R_3HAD180	0.00207858	0	0.236842
R_PG161abcpp	179.298	358.596	108.589	217.178	1	Switch	R_PG161abcpp	0.000428139	0	0.666667
						Backup	R_PGP161abcpp	0	0.000428139	0.666667
						Backup	R_PGPP161pp	0	0.000428139	0.185185
						Non-coessential	R_GLYCLTt4pp	0	1000	0.148148
						Non-coessential	R_FDH4pp	0.410118	0	0.518519
						Non-coessential	R_GTHOr	0	0.058287	0.518519
						Non-coessential	R_GLYCTO2	0.0238917	0	0.185185
						Non-coessential	R_GLYCTO4	0	0.0238917	0.185185
						Non-coessential	R_NADH18pp	0	19.7066	0.555556
						Non-coessential	R_SERt4pp	1000	0	0.148148
						Non-coessential	R_TRPS3	0.0419954	0	0.0740741
						Non-coessential	R_TRPS2	0.0419954	0	0.296296
						Non-coessential	R_GRXR	0	0.058287	0.0740741
						Non-coessential	R_NADH16pp	19.7065	0	0.518519
						Non-coessential	R_PGPP161	0.000428139	0	0.185185
						Non-coessential	R_PAPSR	0.0582871	0	0.481481
						Non-coessential	R_PAPSR2	0	0.058287	0.518519
						Non-coessential	R_CRNt8pp	1000	0	0.0740741
						Non-coessential	R_CRNt2rpp	-1000	0	0.518519
						Non-coessential	R_GLYCLTt2rpp	0	-1000	0.592593
						Non-coessential	R_CRNDt2rpp	1000	0	0.518519
						Non-coessential	R_SERt2rpp	-1000	0	0.592593
						Non-coessential	R_FDH5pp	0	0.410118	0.518519
						Non-coessential	R_TRDR	0.0582871	0	0.481481
						Non-coessential	R_ADK1	0	1000	0.0740741
						Non-coessential	R_FRD3	0	19.7305	0.111111
						Non-coessential	R_FRD2	0	0.410118	0.0740741
						Non-coessential	R_TRPS1	0	0.0419953	0.296296
R_Kt2pp	125.855	302.052	168.372	288.638	0.999099	Switch	R_Kt2pp	0.0848633	0	0.565217
						Backup	R_Kabcpp	0	0.0848149	0.608696
						Non-coessential	R_GLYCLTt4pp	0	1000	0.173913
						Non-coessential	R_CRNDt2rpp	1000	0	0.608696
						Non-coessential	R_GTHOr	0	0.0582539	0.608696
						Non-coessential	R_GLYCTO2	0.0238917	0	0.26087
						Non-coessential	R_GLYCTO4	0	0.0238781	0.217391
						Non-coessential	R_NADH18pp	0	19.7227	0.652174
						Non-coessential	R_NAt3pp	0	1000	0.608696
						Non-coessential	R_GRXR	0	0.0582539	0.0869565
						Non-coessential	R_NADH16pp	19.7065	0	0.652174
						Non-coessential	R_PAPSR	0.0582871	0	0.565217
						Non-coessential	R_PAPSR2	0	0.0582539	0.608696
						Non-coessential	R_CRNt8pp	1000	0	0.0869565
						Non-coessential	R_CRNt2rpp	-1000	0	0.608696
						Non-coessential	R_GLYCLTt2rpp	0	-1000	0.695652
						Non-coessential	R_FDH4pp	0.410118	0	0.652174
						Non-coessential	R_DHORD5	0	0.181066	0.130435
						Non-coessential	R_DHORD2	0.18117	0	0.173913
						Non-coessential	R_FDH5pp	0	0.409885	0.652174
						Non-coessential	R_TRDR	0.0582871	0	0.565217
						Non-coessential	R_ADK1	0	1000	0.0434783
						Non-coessential	R_FRD3	0	19.7465	0.130435
						Non-coessential	R_FRD2	0	0.590951	0.130435
R_GLU5K	384.634	625.031	230.779	600.025	0.998269	Switch	R_GLU5K	0.122789	0	0.166667
						Backup	R_NACODA	0	0.122654	0.0833333
						Non-coessential	R_GLYCLTt4pp	0	1000	0.166667
						Non-coessential	R_ADK1	0	1000	0.0833333
						Non-coessential	R_CRNt2rpp	-1000	0	0.583333
						Non-coessential	R_CRNt8pp	1000	0	0.166667
						Non-coessential	R_G5SD	0.122789	0	0.666667
						Non-coessential	R_GLYCLTt2rpp	0	-1000	0.583333
						Non-coessential	R_CRNDt2rpp	1000	0	0.583333
						Non-coessential	R_SERt2rpp	-1000	0	0.583333
						Non-coessential	R_ASPO3	0	0.00130305	0.5
						Non-coessential	R_ASPO5	0.00130449	0	0.5
						Non-coessential	R_SERt4pp	1000	0	0.166667
R_3OAS180	147.655	358.59	89.4258	152.024	0.999863	Switch	R_3OAS180	0.00207858	0	0.606061
						Backup	R_ACOAD8f	0	-0.0020784	0.0909091
						Backup	R_AACPS6	0	0.0020784	0.151515
						Backup	R_FACOAE180	0	0.0020784	0.666667
						Backup	R_FACOAL181t2pp	0	0.0020784	0.666667
						Backup	R_ODECOAI	0	0.0020784	0.0606061
						Non-coessential	R_GLYCLTt4pp	0	1000	0.121212
						Non-coessential	R_CRNDt2rpp	1000	0	0.606061
						Non-coessential	R_LPLIPAL1A181pp	0	0.0010392	0.636364
						Non-coessential	R_GTHOr	0	0.0582821	0.606061
						Non-coessential	R_GLYCTO2	0.0238917	0	0.151515
						Non-coessential	R_GLYCTO4	0	0.0238896	0.121212
						Non-coessential	R_FADRx	0	0.0020784	0.606061
						Non-coessential	R_SERt4pp	1000	0	0.0606061
						Non-coessential	R_GRXR	0	0.0582821	0.0606061
						Non-coessential	R_NADH16pp	19.7065	0	0.606061
						Non-coessential	R_NADH17pp	0	19.709	0.606061
						Non-coessential	R_PAPSR	0.0582871	0	0.575758
						Non-coessential	R_PAPSR2	0	0.0582821	0.606061
						Non-coessential	R_CRNt8pp	1000	0	0.0606061
						Non-coessential	R_GLYC3Pt6pp	0	0.0010392	0.030303
						Non-coessential	R_EAR180x	0.00207858	0	0.636364
						Non-coessential	R_CRNt2rpp	-1000	0	0.606061
						Non-coessential	R_GLYCLTt2rpp	0	-1000	0.666667
						Non-coessential	R_FDH4pp	0.410118	0	0.606061
						Non-coessential	R_SERt2rpp	-1000	0	0.606061
						Non-coessential	R_FDH5pp	0	0.410083	0.606061
						Non-coessential	R_TRDR	0.0582871	0	0.575758
						Non-coessential	R_ADK1	0	1000	0.0606061
						Non-coessential	R_3OAR180	0.00207858	0	0.606061
						Non-coessential	R_FRD3	0	0.0238896	0.0606061
						Non-coessential	R_FRD2	0	20.1191	0.0909091
						Non-coessential	R_PLIPA2A181pp	0	0.0010392	0.606061
						Non-coessential	R_3HAD180	0.00207858	0	0.151515
R_OA5L_ST	292.514	540.025	209.974	458.124	1.02379	Switch	R_OA5L_ST	0.00044773	0	0.619048
						Backup	R_OA5VL_ST	0	0.000432568	0.619048
						Non-coessential	R_KAS14	0.105576	0	0.666667
						Non-coessential	R_KAS15	0	0.102001	0.666667
						Non-coessential	R_ACt2rpp	0	-1000	0.666667
						Non-coessential	R_GLYCLTt4pp	0	1000	0.190476
						Non-coessential	R_CRNDt2rpp	1000	0	0.666667
						Non-coessential	R_THRt4pp	1000	0	0.190476
						Non-coessential	R_NADH18pp	0	19.2372	0.666667
						Non-coessential	R_SERt4pp	1000	0	0.190476
						Non-coessential	R_NADH16pp	19.7065	0	0.619048
						Non-coessential	R_CRNt8pp	1000	0	0.0952381
						Non-coessential	R_CRNt2rpp	-1000	0	0.666667
						Non-coessential	R_ACOATA	0.105576	0	0.0952381
						Non-coessential	R_GLYCLTt2rpp	0	-1000	0.666667
						Non-coessential	R_FDH4pp	0.410118	0	0.619048
						Non-coessential	R_SERt2rpp	-1000	0	0.666667
						Non-coessential	R_ACt4pp	0	1000	0.190476
						Non-coessential	R_FDH5pp	0	0.39623	0.666667
						Non-coessential	R_ADK1	0	1000	N/A
						Non-coessential	R_CLPNS181pp	1.00345e-05	0	N/A
						Non-coessential	R_THRt2rpp	-1000	0	0.666667
						Non-coessential	R_FRD3	0	19.2372	0.0952381
						Non-coessential	R_FRD2	0	0.39623	0.0952381
R_EAR161x	142.872	285.744	142.873	285.746	0.999974	Switch	R_EAR161x	0.00727502	0	0.538462
						Backup	R_EAR161y	0	0.0072749	0.538462
						Non-coessential	R_GLYCLTt4pp	0	1000	0.153846
						Non-coessential	R_TRPS3	0.0419954	0	0.153846
						Non-coessential	R_TRPS2	0.0419954	0	0.307692
						Non-coessential	R_GRXR	0	0.0582862	0.153846
						Non-coessential	R_PAPSR2	0	0.0582862	0.615385
						Non-coessential	R_GTHOr	0	0.0582862	0.615385
						Non-coessential	R_GLYCLTt2rpp	0	-1000	0.615385
						Non-coessential	R_SERt2rpp	-1000	0	0.769231
						Non-coessential	R_SERt4pp	1000	0	0.307692
						Non-coessential	R_PAPSR	0.0582871	0	0.538462
						Non-coessential	R_TRPS1	0	0.0419947	0.307692
						Non-coessential	R_TRDR	0.0582871	0	0.538462
R_RNTR1c	280.009	538.478	200.011	416.689	0.999957	Switch	R_RNTR1c	0.0124891	0	0.208333
						Backup	R_NDPK8	0	0.0124888	0.125
						Non-coessential	R_GLYCLTt4pp	0	1000	0.166667
						Non-coessential	R_THRt4pp	1000	0	0.166667
						Non-coessential	R_GTHOr	0	0.0707743	0.5
						Non-coessential	R_GLUt2rpp	0	-1000	0.5
						Non-coessential	R_SERt4pp	1000	0	0.25
						Non-coessential	R_TRPS3	0.0419954	0	0.0833333
						Non-coessential	R_TRPS2	0.0419954	0	0.25
						Non-coessential	R_GRXR	0	0.0707743	0.125
						Non-coessential	R_GLUt4pp	0	1000	0.166667
						Non-coessential	R_PAPSR	0.0582871	0	0.458333
						Non-coessential	R_RNDR1b	0	0.0124888	0.291667
						Non-coessential	R_PAPSR2	0	0.0582855	0.541667
						Non-coessential	R_CRNt8pp	1000	0	0.0833333
						Non-coessential	R_CRNt2rpp	-1000	0	0.5
						Non-coessential	R_GLYCLTt2rpp	0	-1000	0.5
						Non-coessential	R_CRNDt2rpp	1000	0	0.5
						Non-coessential	R_SERt2rpp	-1000	0	0.583333
						Non-coessential	R_ASPO3	0	0.00130445	0.458333
						Non-coessential	R_ASPO5	0.00130449	0	0.458333
						Non-coessential	R_TRDR	0.0582871	0	0.458333
						Non-coessential	R_ADK1	0	1000	0.125
						Non-coessential	R_THRt2rpp	-1000	0	0.5
						Non-coessential	R_TRPS1	0	0.0419942	0.25
R_3HAD180	103.456	250.018	103.456	176.484	0.999863	Switch	R_3HAD180	0.00207858	0	0.25
						Backup	R_ACOAD8f	0	-0.0020784	0.107143
						Backup	R_AACPS6	0	0.0020784	0.142857
						Backup	R_FACOAE180	0	0.0020784	0.785714
						Backup	R_FACOAL181t2pp	0	0.0020784	0.678571
						Backup	R_ODECOAI	0	0.0020784	0.0714286
						Non-coessential	R_GLYCLTt4pp	0	1000	0.0714286
						Non-coessential	R_LPLIPAL1A181pp	0	0.0010392	0.75
						Non-coessential	R_GTHOr	0	0.0582821	0.642857
						Non-coessential	R_3OAR180	0.00207858	0	0.642857
						Non-coessential	R_FADRx	0	0.0020784	0.642857
						Non-coessential	R_TRPS3	0.0419954	0	0.0714286
						Non-coessential	R_TRPS2	0.0419954	0	0.214286
						Non-coessential	R_GRXR	0	0.0582821	0.0714286
						Non-coessential	R_PAPSR	0.0582871	0	0.607143
						Non-coessential	R_PAPSR2	0	0.0582821	0.642857
						Non-coessential	R_CRNt8pp	1000	0	0.0714286
						Non-coessential	R_3OAS180	0.00207858	0	0.642857
						Non-coessential	R_EAR180x	0.00207858	0	0.678571
						Non-coessential	R_CRNt2rpp	-1000	0	0.642857
						Non-coessential	R_GLYCLTt2rpp	0	-1000	0.642857
						Non-coessential	R_CRNDt2rpp	1000	0	0.642857
						Non-coessential	R_ASPO3	0	0.00130437	0.607143
						Non-coessential	R_GLYC3Pt6pp	0	0.0010392	0.0357143
						Non-coessential	R_ASPO5	0.00130449	0	0.607143
						Non-coessential	R_TRDR	0.0582871	0	0.607143
						Non-coessential	R_NAt3pp	0	1000	0.642857
						Non-coessential	R_PLIPA2A181pp	0	0.0010392	0.714286
						Non-coessential	R_TRPS1	0	0.0419918	0.214286
R_PIt2rpp	250.032	454.604	150.033	333.406	0.995385	Switch	R_PIt2rpp	0.439394	0	0.578947
						Backup	R_PIuabcpp	0	0.438101	0.736842
						Non-coessential	R_GLYCLTt4pp	0	1000	0.105263
						Non-coessential	R_CRNDt2rpp	1000	0	0.631579
						Non-coessential	R_ADK1	0	1000	0.0526316
						Non-coessential	R_TRPS2	0.0419954	0	0.157895
						Non-coessential	R_GRXR	0	0.0581155	0.105263
						Non-coessential	R_PAPSR2	0	0.0581155	0.631579
						Non-coessential	R_THRt4pp	1000	0	0.105263
						Non-coessential	R_CRNt8pp	1000	0	0.105263
						Non-coessential	R_GTHOr	0	0.0581155	0.631579
						Non-coessential	R_THRt2rpp	-1000	0	0.631579
						Non-coessential	R_CRNt2rpp	-1000	0	0.631579
						Non-coessential	R_PAPSR	0.0582871	0	0.578947
						Non-coessential	R_GLYCLTt2rpp	0	-1000	0.631579
						Non-coessential	R_TRPS3	0.0419954	0	0.105263
						Non-coessential	R_ASPO3	0	0.00130065	0.578947
						Non-coessential	R_ASPO5	0.00130449	0	0.578947
						Non-coessential	R_TRPS1	0	0.0418717	0.157895
						Non-coessential	R_TRDR	0.0582871	0	0.578947
R_PGPP180	112.217	252.489	113.324	203.983	1	Switch	R_PGPP180	0.000214069	0	0.176471
						Backup	R_PGPP180pp	0	0.000214069	0.176471
						Backup	R_PGP180abcpp	0	0.000214069	0.529412
						Non-coessential	R_GLYCLTt4pp	0	1000	0.235294
						Non-coessential	R_ASPO5	0.00130449	0	0.529412
						Non-coessential	R_SERt4pp	1000	0	0.117647
						Non-coessential	R_NADH16pp	19.7065	0	0.529412
						Non-coessential	R_GLYCTO2	0.0238917	0	0.294118
						Non-coessential	R_GLYCTO3	0	0.0238917	0.352941
						Non-coessential	R_FRD3	0	19.7065	0.176471
						Non-coessential	R_GLYCLTt2rpp	0	-1000	0.588235
						Non-coessential	R_SERt2rpp	-1000	0	0.470588
						Non-coessential	R_NADH18pp	0	19.7065	0.470588
						Non-coessential	R_PG180abcpp	0.000214069	0	0.529412
						Non-coessential	R_DHORD5	0	0.18117	0.235294
						Non-coessential	R_DHORD2	0.18117	0	0.176471
						Non-coessential	R_ASPO4	0	0.00130449	0.588235
						Non-coessential	R_FRD2	0	0.206366	0.294118
R_3OAS120	73.8449	185.98	30.0266	49.8002	0.99361	Switch	R_3OAS120	0.0983009	0	0.666667
						Backup	R_AACPS7	0	0.00222951	0.212121
						Backup	R_HACD6i	0	0.00222951	0.606061
						Backup	R_ECOAH6	0	-0.00222951	0.272727
						Backup	R_KAT6	0	0.00222951	0.121212
						Backup	R_FACOAE120	0	0.00222951	0.681818
						Non-coessential	R_PA141abcpp	0	0.00858303	0.742424
						Non-coessential	R_AGPAT141	0	0.00858303	0.166667
						Non-coessential	R_EAR120x	0.0983009	0	0.606061
						Non-coessential	R_G3PAT141	0	0.00858303	0.19697
						Non-coessential	R_FACOAE160	0	0.0786635	0.69697
						Non-coessential	R_FDH4pp	0.410118	0	0.606061
						Non-coessential	R_PLIPA2A141pp	0	0.00858303	0.681818
						Non-coessential	R_LPLIPAL1A181pp	0	0.00103505	0.681818
						Non-coessential	R_FACOAE140	0	0.0149365	0.69697
						Non-coessential	R_3OAR180	0.00207858	0	0.590909
						Non-coessential	R_GLYCTO3	0	0.0237942	0.106061
						Non-coessential	R_PLIPA2A161pp	0	0.0393317	0.651515
						Non-coessential	R_GLYCLTt4pp	0	1000	0.0606061
						Non-coessential	R_3OAR160	0.0810645	0	0.590909
						Non-coessential	R_FADRx	0	0.0956701	0.621212
						Non-coessential	R_3OAR120	0.0983009	0	0.590909
						Non-coessential	R_FACOAE180	0	0.00207009	0.69697
						Non-coessential	R_GRXR	0	0.0580492	0.030303
						Non-coessential	R_EAR160x	0.0810645	0	0.606061
						Non-coessential	R_NADH16pp	19.7065	0	0.606061
						Non-coessential	R_3HAD120	0.0983009	0	0.257576
						Non-coessential	R_HDCOAI	0	0.0786635	0.030303
						Non-coessential	R_NADH17pp	0	19.8225	0.621212
						Non-coessential	R_PAPSR	0.0582871	0	0.575758
						Non-coessential	R_EAR140x	0.0960622	0	0.606061
						Non-coessential	R_ACOAD6f	0	-0.0149365	0.0909091
						Non-coessential	R_3HAD140	0.0960622	0	0.242424
						Non-coessential	R_3HAD160	0.0810645	0	0.257576
						Non-coessential	R_AACPS6	0	0.00207009	0.212121
						Non-coessential	R_GTHOr	0	0.0580492	0.590909
						Non-coessential	R_PAPSR2	0	0.0580492	0.590909
						Non-coessential	R_AACPS3	0	0.0786635	0.212121
						Non-coessential	R_CRNt8pp	1000	0	0.030303
						Non-coessential	R_AACPS1	0	0.0149365	0.212121
						Non-coessential	R_3OAS180	0.00207858	0	0.666667
						Non-coessential	R_ACOAD8f	0	-0.00207009	0.0757576
						Non-coessential	R_EAR180x	0.00207858	0	0.606061
						Non-coessential	R_CRNt2rpp	-1000	0	0.590909
						Non-coessential	R_LPLIPAL1A161pp	0	0.0393317	0.681818
						Non-coessential	R_GLYCLTt2rpp	0	-1000	0.621212
						Non-coessential	R_CRNDt2rpp	1000	0	0.590909
						Non-coessential	R_SERt2rpp	-1000	0	0.590909
						Non-coessential	R_FACOAL161t2pp	0	0.0786635	0.666667
						Non-coessential	R_DHORD5	0	0.18043	0.0757576
						Non-coessential	R_DHORD2	0.18117	0	0.0606061
						Non-coessential	R_FDH5pp	0	0.408444	0.621212
						Non-coessential	R_TRDR	0.0582871	0	0.575758
						Non-coessential	R_FACOAL181t2pp	0	0.00207009	0.666667
						Non-coessential	R_ACOAD7f	0	-0.0786635	0.0757576
						Non-coessential	R_TDECOAI	0	0.0171661	0.0454545
						Non-coessential	R_GLYC3Pt6pp	0	0.0489498	0.0757576
						Non-coessential	R_CLPNS181pp	1.00345e-05	0	N/A
						Non-coessential	R_GLYCTO2	0.0238917	0	0.0909091
						Non-coessential	R_3OAS160	0.0810645	0	0.666667
						Non-coessential	R_LPLIPAL1A141pp	0	0.00858303	0.69697
						Non-coessential	R_FACOAL141t2pp	0	0.0171661	0.666667
						Non-coessential	R_FRD2	0	20.4351	0.0606061
						Non-coessential	R_SERt4pp	1000	0	0.030303
						Non-coessential	R_ODECOAI	0	0.00207009	0.030303
						Non-coessential	R_EAR100x	0.0983009	0	0.575758
						Non-coessential	R_PLIPA2A181pp	0	0.00103505	0.651515
						Non-coessential	R_3HAD180	0.00207858	0	0.257576
R_DHORD2	294.135	555.589	117.679	250.067	1	Switch	R_DHORD2	0.18117	0	0.125
						Backup	R_DHORD5	0	0.18117	0.125
						Non-coessential	R_SERt4pp	1000	0	0.125
						Non-coessential	R_GLYCLTt4pp	0	1000	0.125
						Non-coessential	R_ASPO5	0.00130449	0	0.625
						Non-coessential	R_GRXR	0	0.0582871	0.125
						Non-coessential	R_PAPSR2	0	0.0582871	0.625
						Non-coessential	R_CRNt8pp	1000	0	0.125
						Non-coessential	R_GTHOr	0	0.0582871	0.625
						Non-coessential	R_CRNt2rpp	-1000	0	0.625
						Non-coessential	R_GLYCLTt2rpp	0	-1000	0.625
						Non-coessential	R_CRNDt2rpp	1000	0	0.625
						Non-coessential	R_SERt2rpp	-1000	0	0.625
						Non-coessential	R_ASPO3	0	0.00130449	0.625
						Non-coessential	R_TRDR	0.0582871	0	0.5625
						Non-coessential	R_PAPSR	0.0582871	0	0.5625
						Non-coessential	R_FRD2	0	0.18117	0.125
R_TRDR	117.655	333.357	121.288	187.445	0.629573	Switch	R_TRDR	0.0582871	0	0.533333
						Backup	R_GTHOr	0	0.0582871	0.6
						Backup	R_GRXR	0	0.0582871	0.133333
						Backup	R_PAPSR2	0	0.0582871	0.6
						Non-coessential	R_GLYCLTt4pp	0	1000	0.266667
						Non-coessential	R_FRD3	0	0.0238917	0.133333
						Non-coessential	R_PAPSR	0.0582871	0	0.533333
						Non-coessential	R_FE3tex	0	-27.4115	0.0666667
						Non-coessential	R_EX_fe3_e	0	27.4115	N/A
						Non-coessential	R_GLYCTO2	0.0238917	0	0.266667
						Non-coessential	R_FEROpp	0	6.85288	0.6
						Non-coessential	R_GLYCTO4	0	0.0238917	0.266667
						Non-coessential	R_GLYCLTt2rpp	0	-1000	0.733333
						Non-coessential	R_SERt2rpp	-1000	0	0.6
						Non-coessential	R_SERt4pp	1000	0	0.133333
						Non-coessential	R_ASPO3	0	0.00130449	0.6
						Non-coessential	R_ASPO5	0.00130449	0	0.6
R_PAPA161pp	87.8373	224.473	88.7144	145.745	1.00069	Switch	R_PAPA161pp	0.000179665	0	0.142857
						Backup	R_LIPAabcpp	0	0.00017949	0.619048
						Backup	R_PETNT161pp	0	0.00017949	0.142857
						Non-coessential	R_SERt4pp	1000	0	0.0952381
						Non-coessential	R_GLYCLTt4pp	0	1000	0.190476
						Non-coessential	R_PA161abcpp	0.000183488	0	0.571429
						Non-coessential	R_ENLIPAtex	0	0.00017949	0.047619
						Non-coessential	R_GRXR	0	0.0582303	0.0952381
						Non-coessential	R_PAPSR2	0	0.0582303	0.571429
						Non-coessential	R_GLYCTO4	0	0.0238684	0.238095
						Non-coessential	R_GTHOr	0	0.0582303	0.571429
						Non-coessential	R_NADH16pp	19.7065	0	0.571429
						Non-coessential	R_GLYCTO2	0.0238917	0	0.238095
						Non-coessential	R_FRD3	0	19.7185	0.142857
						Non-coessential	R_GLYCLTt2rpp	0	-1000	0.666667
						Non-coessential	R_FDH4pp	0.410118	0	0.571429
						Non-coessential	R_NADH18pp	0	19.6946	0.619048
						Non-coessential	R_SERt2rpp	-1000	0	0.571429
						Non-coessential	R_TRDR	0.0582871	0	0.52381
						Non-coessential	R_PAPSR	0.0582871	0	0.52381
						Non-coessential	R_FRD2	0	0.409719	0.0952381
						Non-coessential	R_FDH5pp	0	0.409719	0.571429
						Non-coessential	R_EX_enlipa_e	0	0.00017949	N/A
R_GLUDy	208.521	357.465	125.177	300.426	0.947211	Switch	R_GLUDy	-4.09172	0	0.714286
						Backup	R_GLUSy	0	3.94701	0.619048
						Non-coessential	R_KAS14	0.105576	0	0.666667
						Non-coessential	R_KAS15	0	0.101842	0.666667
						Non-coessential	R_ACt2rpp	0	-1000	0.666667
						Non-coessential	R_THRt4pp	1000	0	0.0952381
						Non-coessential	R_GTHOr	0	0.0562258	0.666667
						Non-coessential	R_TRPS3	0.0419954	0	0.0952381
						Non-coessential	R_TRPS2	0.0419954	0	0.142857
						Non-coessential	R_GRXR	0	0.0562258	0.0952381
						Non-coessential	R_PAPSR	0.0582871	0	0.619048
						Non-coessential	R_PAPSR2	0	0.0562258	0.666667
						Non-coessential	R_CRNt8pp	1000	0	0.0952381
						Non-coessential	R_CRNt2rpp	-1000	0	0.666667
						Non-coessential	R_ACOATA	0.105576	0	0.0952381
						Non-coessential	R_CRNDt2rpp	1000	0	0.666667
						Non-coessential	R_ASPO3	0	0.00125835	0.619048
						Non-coessential	R_ASPO5	0.00130449	0	0.619048
						Non-coessential	R_ACt4pp	0	1000	0.0952381
						Non-coessential	R_TRDR	0.0582871	0	0.619048
						Non-coessential	R_ADK1	0	1000	N/A
						Non-coessential	R_CLPNS181pp	1.00345e-05	0	N/A
						Non-coessential	R_THRt2rpp	-1000	0	0.666667
						Non-coessential	R_TRPS1	0	0.0405102	0.142857
R_ADK3	388.951	700.111	222.287	500.147	1	Switch	R_ADK3	0.998162	0	1
						Backup	R_ADK1	0	0.998162	1
						Non-coessential	R_GLYCLTt4pp	0	1000	N/A
						Non-coessential	R_THRt2rpp	-1000	0	N/A
						Non-coessential	R_THRt4pp	1000	0	N/A
						Non-coessential	R_GRXR	0	0.0582871	N/A
						Non-coessential	R_PAPSR2	0	0.0582871	N/A
						Non-coessential	R_GLUt4pp	0	1000	N/A
						Non-coessential	R_CRNt8pp	1000	0	N/A
						Non-coessential	R_SERt2rpp	-1000	0	N/A
						Non-coessential	R_GTHOr	0	0.0582871	N/A
						Non-coessential	R_GLUt2rpp	0	-1000	N/A
						Non-coessential	R_CRNt2rpp	-1000	0	N/A
						Non-coessential	R_GLYCLTt2rpp	0	-1000	N/A
						Non-coessential	R_CRNDt2rpp	1000	0	N/A
						Non-coessential	R_SERt4pp	1000	0	N/A
						Non-coessential	R_PAPSR	0.0582871	0	N/A
						Non-coessential	R_TRDR	0.0582871	0	N/A
R_ZN2tpp	0.0003018	0.001509	600	750	0.999974	Switch	R_ZN2tpp	0.001509	0	0.25
						Backup	R_ZNabcpp	0	0.00150898	0.75
						Non-coessential	R_NAt3pp	0	1000	0.75
						Non-coessential	R_GLYCLTt4pp	0	1000	0.5
						Non-coessential	R_GLYCLTt2rpp	0	-1000	0.75
R_VALTA	200.814	386.181	121.608	253.35	1	Switch	R_VALTA	-0.13598	0	1
						Backup	R_VPAMT	0	0.13598	1
						Non-coessential	R_KAS14	0.105576	0	N/A
						Non-coessential	R_KAS15	0	0.105576	N/A
						Non-coessential	R_ACt2rpp	0	-1000	N/A
						Non-coessential	R_GTHOr	0	0.0582871	N/A
						Non-coessential	R_SERt4pp	1000	0	N/A
						Non-coessential	R_ASPO5	0.00130449	0	N/A
						Non-coessential	R_GRXR	0	0.0582871	N/A
						Non-coessential	R_ACt4pp	0	1000	N/A
						Non-coessential	R_NADH16pp	19.7065	0	N/A
						Non-coessential	R_NADH17pp	0	19.7065	N/A
						Non-coessential	R_PAPSR	0.0582871	0	N/A
						Non-coessential	R_PAPSR2	0	0.0582871	N/A
						Non-coessential	R_CRNt8pp	1000	0	N/A
						Non-coessential	R_CRNt2rpp	-1000	0	N/A
						Non-coessential	R_ACOATA	0.105576	0	N/A
						Non-coessential	R_CRNDt2rpp	1000	0	N/A
						Non-coessential	R_SERt2rpp	-1000	0	N/A
						Non-coessential	R_DHORD5	0	0.18117	N/A
						Non-coessential	R_DHORD2	0.18117	0	N/A
						Non-coessential	R_ASPO4	0	0.00130449	N/A
						Non-coessential	R_TRDR	0.0582871	0	N/A
						Non-coessential	R_ADK1	0	1000	N/A
						Non-coessential	R_FRD2	0	19.889	N/A
R_3OAR180	76.9348	181.846	115.391	200.011	0.999863	Switch	R_3OAR180	0.00207858	0	0.56
						Backup	R_ACOAD8f	0	-0.0020784	0.12
						Backup	R_AACPS6	0	0.0020784	0.28
						Backup	R_FACOAE180	0	0.0020784	0.76
						Backup	R_FACOAL181t2pp	0	0.0020784	0.68
						Backup	R_ODECOAI	0	0.0020784	0.08
						Non-coessential	R_KAS14	0.105576	0	0.6
						Non-coessential	R_KAS15	0	0.105567	0.56
						Non-coessential	R_ACt2rpp	0	-1000	0.56
						Non-coessential	R_ACt4pp	0	1000	0.08
						Non-coessential	R_EAR180x	0.00207858	0	0.6
						Non-coessential	R_TRPS3	0.0419954	0	0.08
						Non-coessential	R_TRPS2	0.0419954	0	0.24
						Non-coessential	R_TRPS1	0	0.0419918	0.24
						Non-coessential	R_THRt4pp	1000	0	0.08
						Non-coessential	R_3OAS180	0.00207858	0	0.6
						Non-coessential	R_LPLIPAL1A181pp	0	0.0010392	0.68
						Non-coessential	R_THRt2rpp	-1000	0	0.56
						Non-coessential	R_ACOATA	0.105576	0	0.24
						Non-coessential	R_3HAD180	0.00207858	0	0.28
						Non-coessential	R_ADK1	0	1000	0.08
						Non-coessential	R_PLIPA2A181pp	0	0.0010392	0.64
						Non-coessential	R_GLYC3Pt6pp	0	0.0010392	0.04
						Non-coessential	R_ASPO5	0.00130449	0	0.52
						Non-coessential	R_ASPO3	0	0.00130437	0.52
						Non-coessential	R_FADRx	0	0.0020784	0.56
R_3OAS160	0.0138572	0.0415715	0.0252478	0.0378718	0.994747	Switch	R_3OAS160	0.0810645	0	0.695652
						Backup	R_FACOAE160	0	0.0787215	0.782609
						Backup	R_AACPS3	0	0.0787215	0.304348
						Non-coessential	R_FACOAL181t2pp	0	0.00207162	0.73913
						Non-coessential	R_ACOAD7f	0	-0.0787215	0.173913
						Non-coessential	R_FACOAE180	0	0.00207162	0.782609
						Non-coessential	R_PLIPA2A181pp	0	0.00103581	0.695652
						Non-coessential	R_3HAD160	0.0810645	0	0.391304
						Non-coessential	R_AACPS6	0	0.00207162	0.304348
						Non-coessential	R_GLYC3Pt6pp	0	0.0403965	0.0869565
						Non-coessential	R_3OAS180	0.00207858	0	0.695652
						Non-coessential	R_EAR160x	0.0810645	0	0.695652
						Non-coessential	R_ACOAD8f	0	-0.00207162	0.173913
						Non-coessential	R_EAR180x	0.00207858	0	0.695652
						Non-coessential	R_3OAR180	0.00207858	0	0.652174
						Non-coessential	R_3HAD180	0.00207858	0	0.391304
						Non-coessential	R_HDCOAI	0	0.0787215	0.0869565
						Non-coessential	R_ODECOAI	0	0.00207162	0.0869565
						Non-coessential	R_PLIPA2A161pp	0	0.0393607	0.695652
						Non-coessential	R_FACOAL161t2pp	0	0.0787215	0.73913
						Non-coessential	R_LPLIPAL1A181pp	0	0.00103581	0.73913
						Non-coessential	R_3OAR160	0.0810645	0	0.652174
						Non-coessential	R_LPLIPAL1A161pp	0	0.0393607	0.73913
						Non-coessential	R_FADRx	0	0.0807931	0.695652
R_GARFT	285.738	500.042	95.2699	222.296	0.996987	Switch	R_GARFT	0.21464	0	0.35
						Backup	R_GART	0	0.214228	0.35
						Non-coessential	R_ASPO5	0.00130449	0	0.45
						Non-coessential	R_ACt2rpp	0	-1000	0.4
						Non-coessential	R_SERt4pp	1000	0	0.3
						Non-coessential	R_TRPS3	0.0419954	0	0.1
						Non-coessential	R_LEUt2rpp	1000	0	0.4
						Non-coessential	R_TRPS1	0	0.0419148	0.2
						Non-coessential	R_THRt4pp	1000	0	0.2
						Non-coessential	R_SERt2rpp	-1000	0	0.5
						Non-coessential	R_ASPO4	0	0.00130198	0.45
						Non-coessential	R_THRt2rpp	-1000	0	0.4
						Non-coessential	R_GLYCTO2	0.0238917	0	0.1
						Non-coessential	R_GLYCTO4	0	0.0238458	0.1
						Non-coessential	R_FRD2	0	0.182124	0.2
						Non-coessential	R_TRPS2	0.0419954	0	0.2
						Non-coessential	R_FRD3	0	0.0238458	0.15
						Non-coessential	R_DHORD5	0	0.180822	0.15
						Non-coessential	R_DHORD2	0.18117	0	0.1
						Non-coessential	R_ACt4pp	0	1000	0.2
						Non-coessential	R_LEUt4rpp	-1000	0	0.2
R_TRPS3	155.37	336.636	156.885	291.358	1	Switch	R_TRPS3	0.0419954	0	0.166667
						Backup	R_TRPS1	0	0.0419954	0.333333
						Non-coessential	R_ACt2rpp	0	-1000	0.333333
						Non-coessential	R_SERt4pp	1000	0	0.333333
						Non-coessential	R_TRPS2	0.0419954	0	0.333333
						Non-coessential	R_NADH16pp	19.7065	0	0.333333
						Non-coessential	R_GLYCTO2	0.0238917	0	0.166667
						Non-coessential	R_GLYCTO3	0	0.0238917	0.166667
						Non-coessential	R_FRD3	0	19.7065	0.166667
						Non-coessential	R_FRD2	0	0.0238917	0.166667
						Non-coessential	R_SERt2rpp	-1000	0	0.5
						Non-coessential	R_ACt4pp	0	1000	0.166667
						Non-coessential	R_NADH18pp	0	19.7065	0.333333
R_FORtppi	238.158	416.776	142.901	333.437	0.989659	Switch	R_FORtppi	0.410118	0	0.157895
						Backup	R_GART	0	0.0270702	0.473684
						Non-coessential	R_ACt2rpp	0	-1000	0.421053
						Non-coessential	R_ACALD	0	0.407399	0.421053
						Non-coessential	R_FDH4pp	0.410118	0	0.473684
						Non-coessential	R_THRt4pp	1000	0	0.157895
						Non-coessential	R_THRt2rpp	-1000	0	0.473684
						Non-coessential	R_TRPS3	0.0419954	0	0.105263
						Non-coessential	R_TRPS2	0.0419954	0	0.157895
						Non-coessential	R_TRPS1	0	0.0417169	0.157895
						Non-coessential	R_CLPNS181pp	1.00345e-05	0	N/A
						Non-coessential	R_THRAi	0	0.407399	0.157895
						Non-coessential	R_CRNt8pp	1000	0	0.105263
						Non-coessential	R_ADK1	0	1000	0.0526316
						Non-coessential	R_CRNt2rpp	-1000	0	0.421053
						Non-coessential	R_GLYCTO4	0	0.0237333	0.105263
						Non-coessential	R_GLYCTO2	0.0238917	0	0.105263
						Non-coessential	R_CRNDt2rpp	1000	0	0.421053
						Non-coessential	R_FRD3	0	0.0237333	0.0526316
						Non-coessential	R_FTHFD	0.382868	0	0.526316
						Non-coessential	R_ACt4pp	0	1000	0.105263
R_EAR80x	0.052788	0.105576	0.0527755	0.105551	0.999622	Switch	R_EAR80x	0.105576	0	1
						Backup	R_EAR80y	0	0.105551	1
R_NDPK3	160.008	400.02	160.017	266.695	0.998149	Switch	R_NDPK3	0.0594681	0	0.125
						Non-coessential	R_ACt2rpp	0	-1000	0.541667
						Non-coessential	R_GLYCLTt4pp	0	1000	0.166667
						Non-coessential	R_THRt4pp	1000	0	0.166667
						Non-coessential	R_GTHOr	0	0.0843272	0.541667
						Non-coessential	R_SERt4pp	1000	0	0.166667
						Non-coessential	R_NDPK7	0	0.0261087	0.166667
						Non-coessential	R_GRXR	0	0.0843272	0.125
						Non-coessential	R_URIK2	0	0.0332894	0.541667
						Non-coessential	R_PAPSR	0.0582871	0	0.5
						Non-coessential	R_CSND	0	0.0332894	0.708333
						Non-coessential	R_RNDR3b	0	0.0261087	0.375
						Non-coessential	R_PAPSR2	0	0.0582185	0.583333
						Non-coessential	R_DCTPD	0	0.0124744	0.708333
						Non-coessential	R_RNTR3c	0.0136503	0	0.291667
						Non-coessential	R_SERt2rpp	-1000	0	0.541667
						Non-coessential	R_ASPO3	0	0.00130295	0.5
						Non-coessential	R_ASPO5	0.00130449	0	0.5
						Non-coessential	R_ACt4pp	0	1000	0.166667
						Non-coessential	R_TRDR	0.0582871	0	0.5
						Non-coessential	R_PYNP2r	0	-0.0332894	0.0833333
						Non-coessential	R_RNTR4c	0.0124891	0	0.208333
						Non-coessential	R_THRt2rpp	-1000	0	0.541667
						Non-coessential	R_CMPN	0	0.0332894	0.208333
						Non-coessential	R_GLYCLTt2rpp	0	-1000	0.541667
R_ORNDC	0.00334483	0.020069	0.0167129	0.0200555	0.998936	Switch	R_ORNDC	0.020069	0	0.5
						Backup	R_AGMT	0	0.0200555	1
						Backup	R_UREAtex	0	-0.0200555	0.5
						Backup	R_UREAtpp	0	-0.0200555	0.5
						Non-coessential	R_EX_urea_e	0	0.0200555	N/A
						Non-coessential	R_ARGDC	0	0.0200555	0.5
R_RNTR2c	185.944	386.191	112.616	217.187	0.999948	Switch	R_RNTR2c	0.0136503	0	0.0769231
						Backup	R_NDPK5	0	0.0136499	0.115385
						Non-coessential	R_KAS14	0.105576	0	0.538462
						Non-coessential	R_KAS15	0	0.105573	0.538462
						Non-coessential	R_GLYCLTt4pp	0	1000	0.153846
						Non-coessential	R_FDH4pp	0.410118	0	0.538462
						Non-coessential	R_GTHOr	0	0.0719352	0.538462
						Non-coessential	R_GLYCTO2	0.0238917	0	0.192308
						Non-coessential	R_GLYCTO4	0	0.023891	0.192308
						Non-coessential	R_RNDR2b	0	0.0136499	0.153846
						Non-coessential	R_NADH18pp	0	19.7101	0.576923
						Non-coessential	R_SERt4pp	1000	0	0.0769231
						Non-coessential	R_GRXR	0	0.0719352	0.115385
						Non-coessential	R_NADH16pp	19.7065	0	0.538462
						Non-coessential	R_PAPSR	0.0582871	0	0.5
						Non-coessential	R_PAPSR2	0	0.0582853	0.576923
						Non-coessential	R_CRNt8pp	1000	0	0.0769231
						Non-coessential	R_CRNt2rpp	-1000	0	0.538462
						Non-coessential	R_ACOATA	0.105576	0	0.0769231
						Non-coessential	R_GLYCLTt2rpp	0	-1000	0.615385
						Non-coessential	R_CRNDt2rpp	1000	0	0.538462
						Non-coessential	R_SERt2rpp	-1000	0	0.538462
						Non-coessential	R_FDH5pp	0	0.410106	0.538462
						Non-coessential	R_TRDR	0.0582871	0	0.5
						Non-coessential	R_ADK1	0	1000	0.0384615
						Non-coessential	R_FRD3	0	19.734	0.115385
						Non-coessential	R_FRD2	0	0.410106	0.0769231
R_EAR141x	218.258	418.328	132.16	276.335	0.999974	Switch	R_EAR141x	0.00727502	0	0.52381
						Backup	R_EAR141y	0	0.0072749	0.52381
						Non-coessential	R_SERt4pp	1000	0	0.190476
						Non-coessential	R_FRD3	0	19.7323	0.0952381
						Non-coessential	R_TRPS3	0.0419954	0	0.0952381
						Non-coessential	R_TRPS2	0.0419954	0	0.190476
						Non-coessential	R_GRXR	0	0.0582862	0.0952381
						Non-coessential	R_PAPSR2	0	0.0582862	0.571429
						Non-coessential	R_CRNt8pp	1000	0	0.0952381
						Non-coessential	R_SERt2rpp	-1000	0	0.666667
						Non-coessential	R_GTHOr	0	0.0582862	0.571429
						Non-coessential	R_NADH16pp	19.7065	0	0.571429
						Non-coessential	R_GLYCTO2	0.0238917	0	0.190476
						Non-coessential	R_TRPS1	0	0.0419947	0.190476
						Non-coessential	R_GLYCTO4	0	0.0238913	0.238095
						Non-coessential	R_GLYCLTt2rpp	0	-1000	0.666667
						Non-coessential	R_CRNDt2rpp	1000	0	0.571429
						Non-coessential	R_GLYCLTt4pp	0	1000	0.190476
						Non-coessential	R_CRNt2rpp	-1000	0	0.571429
						Non-coessential	R_PAPSR	0.0582871	0	0.52381
						Non-coessential	R_ADK1	0	1000	N/A
						Non-coessential	R_TRDR	0.0582871	0	0.52381
						Non-coessential	R_NADH18pp	0	19.7084	0.619048
R_RNTR3c	0.0045501	0.0136503	0.00909993	0.0136499	0.999948	Switch	R_RNTR3c	0.0136503	0	1
						Backup	R_NDPK7	0	0.0136499	1
						Non-coessential	R_RNDR3	0	0.0136499	1

## Sheet: CONTROL_clusters
Switch	index	Reactions in set
R_H2Otex	1	R_ACALD
	1	R_ACt2rpp
	1	R_ACtex
	1	R_ADK1
	1	R_AKGDH
	1	R_ASP1DC
	1	R_ASPO3
	1	R_ASPO5
	1	R_CLPNS161pp
	1	R_CLPNS181pp
	1	R_CRNDt2rpp
	1	R_CRNt2rpp
	1	R_CRNt8pp
	1	R_DPCOAK
	1	R_ETOHt2rpp
	1	R_ETOHtex
	1	R_EX_ac_e
	1	R_EX_etoh_e
	1	R_EX_for_e
	1	R_EX_glyclt_e
	1	R_EX_h2o_e
	1	R_FDH4pp
	1	R_FORtex
	1	R_G6PDH2r
	1	R_GLYCLTt2rpp
	1	R_GLYCLTtex
	1	R_GLYCTO2
	1	R_GND
	1	R_GRXR
	1	R_GTHOr
	1	R_H2Otex
	1	R_ICL
	1	R_LEUt2rpp
	1	R_MOHMT
	1	R_NDPK5
	1	R_NDPK6
	1	R_NDPK7
	1	R_NDPK8
	1	R_PANTS
	1	R_PAPSR
	1	R_PAPSR2
	1	R_PDH
	1	R_PFL
	1	R_PGL
	1	R_PNTK
	1	R_PPC
	1	R_PPCDC
	1	R_PPNCL2
	1	R_PTPATi
	1	R_RNDR1b
	1	R_RNDR2b
	1	R_RNDR3b
	1	R_RNDR4b
	1	R_RNTR1c
	1	R_RNTR2c
	1	R_RNTR3c
	1	R_RNTR4c
	1	R_THD2pp
	1	R_THRt2rpp
	1	R_THRt4pp
	1	R_TRDR
	1	R_ALCD2x
	1	R_DPR
	1	R_LEUt4rpp
	1	R_PFOR
R_URIt2rpp	2	R_ACOATA
	2	R_ACt2rpp
	2	R_ACt4pp
	2	R_ADK1
	2	R_ASPO3
	2	R_ASPO5
	2	R_CRNDt2rpp
	2	R_CRNt2rpp
	2	R_CRNt8pp
	2	R_FDH4pp
	2	R_FDH5pp
	2	R_FRD2
	2	R_KAS14
	2	R_KAS15
	2	R_NADH16pp
	2	R_NADH17pp
	2	R_THRt2rpp
	2	R_THRt4pp
	2	R_TRPS1
	2	R_TRPS2
	2	R_TRPS3
	2	R_URIt2pp
	2	R_URIt2rpp
R_ADNt2pp	3	R_ACOATA
	3	R_ADNt2pp
	3	R_ADNt2rpp
	3	R_FDH4pp
	3	R_FDH5pp
	3	R_FRD2
	3	R_FRD3
	3	R_GLYCLTt2rpp
	3	R_GLYCLTt4pp
	3	R_GLYCTO2
	3	R_GLYCTO4
	3	R_GRXR
	3	R_GTHOr
	3	R_KAS14
	3	R_KAS15
	3	R_NADH16pp
	3	R_NADH18pp
	3	R_PAPSR
	3	R_PAPSR2
	3	R_SERt2rpp
	3	R_SERt4pp
	3	R_TRDR
	3	R_TRPS1
	3	R_TRPS2
	3	R_TRPS3
R_LEUt2rpp	4	R_ACOATA
	4	R_ADK1
	4	R_ASPO3
	4	R_ASPO5
	4	R_GLYCLTt2rpp
	4	R_GLYCLTt4pp
	4	R_GRXR
	4	R_GTHOr
	4	R_KAS14
	4	R_KAS15
	4	R_LEUt2rpp
	4	R_PAPSR
	4	R_PAPSR2
	4	R_SERt2rpp
	4	R_SERt4pp
	4	R_THRt2rpp
	4	R_THRt4pp
	4	R_TRDR
	4	R_LEUt4rpp
R_FDH4pp	5	R_DHORD2
	5	R_DHORD5
	5	R_FDH4pp
	5	R_FDH5pp
	5	R_FRD2
	5	R_FRD3
	5	R_GLYCLTt2rpp
	5	R_GLYCLTt4pp
	5	R_GLYCTO2
	5	R_GLYCTO4
	5	R_GRXR
	5	R_GTHOr
	5	R_NADH16pp
	5	R_NADH18pp
	5	R_PAPSR
	5	R_PAPSR2
	5	R_SERt2rpp
	5	R_SERt4pp
	5	R_TRDR
R_THRt4pp	6	R_ACOATA
	6	R_ACt2rpp
	6	R_ACt4pp
	6	R_ADK1
	6	R_ASPO3
	6	R_ASPO5
	6	R_CRNDt2rpp
	6	R_CRNt2rpp
	6	R_CRNt8pp
	6	R_GLYCLTt2rpp
	6	R_GLYCLTt4pp
	6	R_GRXR
	6	R_GTHOr
	6	R_KAS14
	6	R_KAS15
	6	R_PAPSR
	6	R_PAPSR2
	6	R_SERt2rpp
	6	R_SERt4pp
	6	R_THRt2rpp
	6	R_THRt4pp
	6	R_TRDR
R_PTAr	7	R_ACKr
	7	R_ACS
	7	R_ACt2rpp
	7	R_ACt4pp
	7	R_ADK1
	7	R_CA2t3pp
	7	R_CRNDt2rpp
	7	R_CRNt2rpp
	7	R_CRNt8pp
	7	R_PTAr
	7	R_THRt2rpp
	7	R_THRt4pp
R_PGI	8	R_ACOATA
	8	R_ADK1
	8	R_ASPO3
	8	R_ASPO5
	8	R_CLPNS181pp
	8	R_CRNDt2rpp
	8	R_CRNt2rpp
	8	R_CRNt8pp
	8	R_GLCt2pp
	8	R_GLYCLTt2rpp
	8	R_GLYCLTt4pp
	8	R_HEX7
	8	R_KAS14
	8	R_KAS15
	8	R_PGI
	8	R_THRt2rpp
	8	R_THRt4pp
	8	R_TRPS1
	8	R_TRPS2
	8	R_TRPS3
	8	R_XYLI2
R_FE2tpp	9	R_FE2t2pp
	9	R_FE2tpp
	9	R_GLYCLTt2rpp
	9	R_GLYCLTt4pp
	9	R_SERt2rpp
	9	R_SERt4pp
R_GLYCTO2	10	R_FRD2
	10	R_GLYCTO2
	10	R_GLYCTO3
R_URIDK2r	11	R_ACt2rpp
	11	R_ACt4pp
	11	R_ADK1
	11	R_ASPO3
	11	R_ASPO5
	11	R_CRNDt2rpp
	11	R_CRNt2rpp
	11	R_CRNt8pp
	11	R_DGK1
	11	R_DHORD2
	11	R_DHORD5
	11	R_DURIK1
	11	R_DURIPP
	11	R_FDH4pp
	11	R_FDH5pp
	11	R_FRD2
	11	R_GRXR
	11	R_GSNK
	11	R_GTHOr
	11	R_NDPK5
	11	R_NDPK6
	11	R_NTD2
	11	R_NTD8
	11	R_PAPSR
	11	R_PAPSR2
	11	R_PUNP3
	11	R_PUNP4
	11	R_PYNP2r
	11	R_RNTR4c
	11	R_SERt2rpp
	11	R_SERt4pp
	11	R_TRDR
	11	R_TRPS1
	11	R_TRPS2
	11	R_TRPS3
	11	R_URIDK2r
R_SERt2rpp	12	R_ACOATA
	12	R_ACt2rpp
	12	R_ACt4pp
	12	R_ADK1
	12	R_ASPO3
	12	R_ASPO5
	12	R_CRNDt2rpp
	12	R_CRNt2rpp
	12	R_CRNt8pp
	12	R_GLYCLTt2rpp
	12	R_GLYCLTt4pp
	12	R_GRXR
	12	R_GTHOr
	12	R_KAS14
	12	R_KAS15
	12	R_PAPSR
	12	R_PAPSR2
	12	R_SERt2rpp
	12	R_SERt4pp
	12	R_THRt2rpp
	12	R_THRt4pp
	12	R_TRDR
R_PGL	13	R_ASPO3
	13	R_ASPO5
	13	R_CLPNS181pp
	13	R_CRNDt2rpp
	13	R_CRNt2rpp
	13	R_CRNt8pp
	13	R_G6PDH2r
	13	R_GND
	13	R_GRXR
	13	R_GTHOr
	13	R_PAPSR
	13	R_PAPSR2
	13	R_PGL
	13	R_THD2pp
	13	R_TRDR
	13	R_TRPS1
	13	R_TRPS2
	13	R_TRPS3
R_CYTDt2rpp	14	R_ACOATA
	14	R_ACt2rpp
	14	R_ACt4pp
	14	R_ADK1
	14	R_ASPO3
	14	R_ASPO5
	14	R_CRNDt2rpp
	14	R_CRNt2rpp
	14	R_CRNt8pp
	14	R_CYTDt2pp
	14	R_CYTDt2rpp
	14	R_FRD3
	14	R_GLYCTO2
	14	R_GLYCTO4
	14	R_GRXR
	14	R_GTHOr
	14	R_KAS14
	14	R_KAS15
	14	R_PAPSR
	14	R_PAPSR2
	14	R_THRt2rpp
	14	R_THRt4pp
	14	R_TRDR
	14	R_TRPS1
	14	R_TRPS2
	14	R_TRPS3
R_CA2t3pp	15	R_ACOATA
	15	R_ACt2rpp
	15	R_ACt4pp
	15	R_ADK1
	15	R_ASPO3
	15	R_ASPO5
	15	R_CA2t3pp
	15	R_DHORD2
	15	R_DHORD5
	15	R_FDH4pp
	15	R_FDH5pp
	15	R_FRD2
	15	R_KAS14
	15	R_KAS15
	15	R_NADH16pp
	15	R_NADH17pp
	15	R_SERt2rpp
	15	R_SERt4pp
	15	R_THRt2rpp
	15	R_THRt4pp
	15	R_NAt3pp
R_THMDt2rpp	16	R_ACOATA
	16	R_ACt2rpp
	16	R_ACt4pp
	16	R_ADK1
	16	R_ASPO3
	16	R_ASPO5
	16	R_CRNDt2rpp
	16	R_CRNt2rpp
	16	R_CRNt8pp
	16	R_GRXR
	16	R_GTHOr
	16	R_KAS14
	16	R_KAS15
	16	R_PAPSR
	16	R_PAPSR2
	16	R_THMDt2pp
	16	R_THMDt2rpp
	16	R_THRt2rpp
	16	R_THRt4pp
	16	R_TRDR
R_GLYBtex	17	R_ADK1
	17	R_ASPO3
	17	R_ASPO5
	17	R_GLYBtex
	17	R_GLYCLTt2rpp
	17	R_GLYCLTt4pp
	17	R_GRXR
	17	R_GTHOr
	17	R_PAPSR
	17	R_PAPSR2
	17	R_SERt2rpp
	17	R_SERt4pp
	17	R_TRDR
	17	R_TRPS1
	17	R_TRPS2
	17	R_TRPS3
	17	R_GLYBt6ex
R_COBALT2tpp	18	R_COBALT2tpp
R_PA180abcpp	19	R_ASPO4
	19	R_ASPO5
	19	R_CLPNH180pp
	19	R_CLPNS180pp
	19	R_DHORD2
	19	R_DHORD5
	19	R_FDH4pp
	19	R_FDH5pp
	19	R_FRD2
	19	R_FRD3
	19	R_GLYCLTt2rpp
	19	R_GLYCLTt4pp
	19	R_NADH16pp
	19	R_NADH18pp
	19	R_PA180abcpp
	19	R_SERt2rpp
	19	R_SERt4pp
R_SERt4pp	20	R_ASPO3
	20	R_ASPO5
	20	R_FDH4pp
	20	R_FDH5pp
	20	R_FRD2
	20	R_FRD3
	20	R_GLYCLTt2rpp
	20	R_GLYCLTt4pp
	20	R_GLYCTO2
	20	R_GLYCTO4
	20	R_GRXR
	20	R_GTHOr
	20	R_NADH16pp
	20	R_NADH18pp
	20	R_PAPSR
	20	R_PAPSR2
	20	R_SERt2rpp
	20	R_SERt4pp
	20	R_TRDR
R_PYK	21	R_ACOATA
	21	R_ACt2rpp
	21	R_ACt4pp
	21	R_ADK1
	21	R_CA2t3pp
	21	R_CRNDt2rpp
	21	R_CRNt2rpp
	21	R_CRNt8pp
	21	R_GLUt2rpp
	21	R_GLUt4pp
	21	R_GRXR
	21	R_GTHOr
	21	R_KAS14
	21	R_KAS15
	21	R_PAPSR
	21	R_PAPSR2
	21	R_PYK
	21	R_SERt2rpp
	21	R_SERt4pp
	21	R_THRt2rpp
	21	R_THRt4pp
	21	R_TRDR
	21	R_TRPS1
	21	R_TRPS2
	21	R_TRPS3
	21	R_OAADCS
R_URIt2pp	22	R_GLYCLTt2rpp
	22	R_GLYCLTt4pp
	22	R_THRt2rpp
	22	R_THRt4pp
	22	R_URIt2pp
	22	R_URIt2rpp
R_INSt2rpp	23	R_ACOATA
	23	R_ACt2rpp
	23	R_ACt4pp
	23	R_ADK1
	23	R_ASPO3
	23	R_ASPO5
	23	R_CRNDt2rpp
	23	R_CRNt2rpp
	23	R_CRNt8pp
	23	R_INSt2pp
	23	R_INSt2rpp
	23	R_KAS14
	23	R_KAS15
	23	R_THRt2rpp
	23	R_THRt4pp
	23	R_TRPS1
	23	R_TRPS2
	23	R_TRPS3
R_GLCptspp	24	R_CLPNS181pp
	24	R_GLCptspp
	24	R_GLCt2pp
	24	R_HEX7
	24	R_XYLI2
R_FTHFD	25	R_ADK1
	25	R_ASPO4
	25	R_ASPO5
	25	R_CLPNS181pp
	25	R_CRNDt2rpp
	25	R_CRNt2rpp
	25	R_CRNt8pp
	25	R_DHORD2
	25	R_DHORD5
	25	R_FDH4pp
	25	R_FDH5pp
	25	R_FRD2
	25	R_FTHFD
	25	R_GLYAT
	25	R_GLYCLTt2rpp
	25	R_GLYCLTt4pp
	25	R_GLYCTO2
	25	R_GLYCTO3
	25	R_GRXR
	25	R_GTHOr
	25	R_NADH16pp
	25	R_NADH17pp
	25	R_PAPSR
	25	R_PAPSR2
	25	R_SERt2rpp
	25	R_SERt4pp
	25	R_THRD
	25	R_TRDR
	25	R_TRPS1
	25	R_TRPS2
	25	R_TRPS3
R_MN2tpp	26	R_MN2tpp
	26	R_MNt2pp
R_EAR160x	27	R_ADK1
	27	R_ASPO4
	27	R_ASPO5
	27	R_EAR160x
	27	R_EAR160y
	27	R_FDH4pp
	27	R_FDH5pp
	27	R_FRD2
	27	R_GLYCLTt2rpp
	27	R_GLYCLTt4pp
	27	R_GLYCTO2
	27	R_GLYCTO3
	27	R_NADH16pp
	27	R_NADH17pp
	27	R_SERt2rpp
	27	R_SERt4pp
	27	R_TRPS1
	27	R_TRPS2
	27	R_TRPS3
R_CYTBO3_4pp	28	R_CLPNS181pp
	28	R_CYTBO3_4pp
	28	R_FRD3
	28	R_GLYCTO2
	28	R_GLYCTO4
	28	R_GRXR
	28	R_GTHOr
	28	R_NADH16pp
	28	R_NADH18pp
	28	R_PAPSR
	28	R_PAPSR2
	28	R_TRDR
	28	R_CYTBDpp
R_NADH16pp	29	R_DHORD2
	29	R_DHORD5
	29	R_FRD2
	29	R_GLYCTO2
	29	R_GLYCTO3
	29	R_NADH16pp
	29	R_NADH17pp
	29	R_TRPS1
	29	R_TRPS2
	29	R_TRPS3
R_RNTR4c	30	R_GLYCLTt2rpp
	30	R_GLYCLTt4pp
	30	R_GRXR
	30	R_GTHOr
	30	R_NDPK6
	30	R_PAPSR
	30	R_PAPSR2
	30	R_RNDR4
	30	R_RNTR4c
	30	R_NAt3pp
R_CYTDt2pp	31	R_ADK1
	31	R_CYTDt2pp
	31	R_CYTDt2rpp
	31	R_FRD2
	31	R_FRD3
	31	R_GLYCLTt2rpp
	31	R_GLYCLTt4pp
	31	R_GLYCTO2
	31	R_GLYCTO3
	31	R_NADH16pp
	31	R_NADH18pp
	31	R_SERt2rpp
	31	R_SERt4pp
R_HPYRRx	32	R_ACOATA
	32	R_ADK1
	32	R_ASPO3
	32	R_ASPO5
	32	R_CRNDt2rpp
	32	R_CRNt2rpp
	32	R_CRNt8pp
	32	R_GLYCLTt2rpp
	32	R_GLYCLTt4pp
	32	R_HPYRI
	32	R_HPYRRx
	32	R_KAS14
	32	R_KAS15
	32	R_THRt2rpp
	32	R_THRt4pp
	32	R_TRPS1
	32	R_TRPS2
	32	R_TRPS3
	32	R_TRSARr
R_LEUt4rpp	33	R_ADK1
	33	R_CRNDt2rpp
	33	R_CRNt2rpp
	33	R_CRNt8pp
	33	R_FDH4pp
	33	R_FDH5pp
	33	R_FRD2
	33	R_GLYCLTt2rpp
	33	R_GLYCLTt4pp
	33	R_GRXR
	33	R_GTHOr
	33	R_LEUt2rpp
	33	R_NADH16pp
	33	R_NADH17pp
	33	R_PAPSR
	33	R_PAPSR2
	33	R_SERt2rpp
	33	R_SERt4pp
	33	R_THRt2rpp
	33	R_THRt4pp
	33	R_TRDR
	33	R_TRPS1
	33	R_TRPS2
	33	R_TRPS3
	33	R_LEUt4rpp
R_EAR140x	34	R_ASPO3
	34	R_ASPO5
	34	R_CRNDt2rpp
	34	R_CRNt2rpp
	34	R_CRNt8pp
	34	R_EAR140x
	34	R_EAR140y
	34	R_FRD3
	34	R_GLYCLTt2rpp
	34	R_GLYCLTt4pp
	34	R_GLYCTO2
	34	R_GLYCTO4
	34	R_GRXR
	34	R_GTHOr
	34	R_NADH16pp
	34	R_NADH18pp
	34	R_PAPSR
	34	R_PAPSR2
	34	R_THRt2rpp
	34	R_THRt4pp
	34	R_TRDR
R_PDH	35	R_ADK1
	35	R_CLPNS181pp
	35	R_CRNDt2rpp
	35	R_CRNt2rpp
	35	R_CRNt8pp
	35	R_FDH4pp
	35	R_FDH5pp
	35	R_FRD2
	35	R_GLYCLTt2rpp
	35	R_GLYCLTt4pp
	35	R_NADH16pp
	35	R_NADH17pp
	35	R_PDH
	35	R_PFL
	35	R_SERt2rpp
	35	R_SERt4pp
R_TRSARr	36	R_ACOATA
	36	R_ACt2rpp
	36	R_ACt4pp
	36	R_ADK1
	36	R_ASPO3
	36	R_ASPO5
	36	R_CRNDt2rpp
	36	R_CRNt2rpp
	36	R_CRNt8pp
	36	R_FRD3
	36	R_GLYCLTt2rpp
	36	R_GLYCLTt4pp
	36	R_GRXR
	36	R_GTHOr
	36	R_HPYRI
	36	R_HPYRRx
	36	R_KAS14
	36	R_KAS15
	36	R_NADH16pp
	36	R_NADH18pp
	36	R_PAPSR
	36	R_PAPSR2
	36	R_THRt2rpp
	36	R_THRt4pp
	36	R_TRDR
	36	R_TRPS1
	36	R_TRPS2
	36	R_TRPS3
	36	R_TRSARr
	36	R_NAt3pp
R_PA160abcpp	37	R_CLPNH160pp
	37	R_PA160abcpp
R_PA161abcpp	38	R_CLPNH161pp
	38	R_PA161abcpp
R_Cobalt2abcppII	39	R_ADK1
	39	R_ASPO4
	39	R_ASPO5
	39	R_CRNDt2rpp
	39	R_CRNt2rpp
	39	R_CRNt8pp
	39	R_DHORD2
	39	R_DHORD5
	39	R_FDH4pp
	39	R_FDH5pp
	39	R_FRD2
	39	R_GLYCLTt2rpp
	39	R_GLYCLTt4pp
	39	R_GLYCTO2
	39	R_GLYCTO3
	39	R_NADH16pp
	39	R_NADH17pp
	39	R_SERt2rpp
	39	R_SERt4pp
	39	R_Cobalt2abcppII
R_INSt2pp	40	R_INSt2pp
	40	R_INSt2rpp
R_CO2tex	41	R_AGMT
	41	R_AKGDH
	41	R_ARGDC
	41	R_ASPO3
	41	R_ASPO5
	41	R_CLPNS161pp
	41	R_CLPNS181pp
	41	R_CO2tex
	41	R_CO2tpp
	41	R_CRNDt2rpp
	41	R_CRNt2rpp
	41	R_CRNt8pp
	41	R_EX_co2_e
	41	R_EX_for_e
	41	R_EX_glyclt_e
	41	R_EX_urea_e
	41	R_FDH4pp
	41	R_FLDR
	41	R_FORtex
	41	R_FRD3
	41	R_G6PDH2r
	41	R_GLYCLTDx
	41	R_GLYCLTt2rpp
	41	R_GLYCLTt4pp
	41	R_GLYCLTtex
	41	R_GLYCTO2
	41	R_GND
	41	R_GRXR
	41	R_GTHOr
	41	R_ICL
	41	R_NADH16pp
	41	R_NADH18pp
	41	R_NDPK6
	41	R_NDPK7
	41	R_ORNDC
	41	R_PAPSR
	41	R_PAPSR2
	41	R_PDH
	41	R_PFL
	41	R_PGL
	41	R_RNDR3b
	41	R_RNDR4
	41	R_RNTR3c
	41	R_RNTR4c
	41	R_THD2pp
	41	R_UREAtex
	41	R_UREAtpp
	41	R_PFOR
R_CRNt8pp	42	R_ASPO3
	42	R_ASPO5
	42	R_CRNDt2rpp
	42	R_CRNt2rpp
	42	R_CRNt8pp
	42	R_FRD3
	42	R_GLYCLTt2rpp
	42	R_GLYCLTt4pp
	42	R_NADH16pp
	42	R_NADH18pp
	42	R_SERt2rpp
	42	R_SERt4pp
R_ACKr	43	R_ACKr
	43	R_ACOATA
	43	R_ACS
	43	R_ACt2rpp
	43	R_ACt4pp
	43	R_ADK1
	43	R_ASPO3
	43	R_ASPO5
	43	R_CRNDt2rpp
	43	R_CRNt2rpp
	43	R_CRNt8pp
	43	R_GRXR
	43	R_GTHOr
	43	R_KAS14
	43	R_KAS15
	43	R_PAPSR
	43	R_PAPSR2
	43	R_PTAr
	43	R_SERt2rpp
	43	R_SERt4pp
	43	R_TRDR
R_EAR180x	44	R_ASPO3
	44	R_ASPO5
	44	R_CRNDt2rpp
	44	R_CRNt2rpp
	44	R_CRNt8pp
	44	R_DHORD2
	44	R_DHORD5
	44	R_EAR180x
	44	R_EAR180y
	44	R_FRD2
	44	R_FRD3
	44	R_GLYCLTt2rpp
	44	R_GLYCLTt4pp
	44	R_GLYCTO2
	44	R_GLYCTO3
	44	R_NADH16pp
	44	R_NADH18pp
	44	R_SERt2rpp
	44	R_SERt4pp
R_CRNt2rpp	45	R_ACOATA
	45	R_ACt2rpp
	45	R_ACt4pp
	45	R_ADK1
	45	R_ASPO3
	45	R_ASPO5
	45	R_CRNDt2rpp
	45	R_CRNt2rpp
	45	R_CRNt8pp
	45	R_GLUt2rpp
	45	R_GLUt4pp
	45	R_KAS14
	45	R_KAS15
	45	R_SERt2rpp
	45	R_SERt4pp
	45	R_THRt2rpp
	45	R_THRt4pp
	45	R_TRPS1
	45	R_TRPS2
	45	R_TRPS3
R_ACOATA	46	R_ACOATA
	46	R_ADK1
	46	R_ASPO4
	46	R_ASPO5
	46	R_CRNDt2rpp
	46	R_CRNt2rpp
	46	R_CRNt8pp
	46	R_DHORD2
	46	R_DHORD5
	46	R_FRD2
	46	R_GLUt2rpp
	46	R_GLUt4pp
	46	R_KAS14
	46	R_KAS15
	46	R_THRt2rpp
	46	R_THRt4pp
R_CRNDt2rpp	47	R_ACt2rpp
	47	R_ACt4pp
	47	R_ADK1
	47	R_ASPO3
	47	R_ASPO5
	47	R_CRNDt2rpp
	47	R_CRNt2rpp
	47	R_CRNt8pp
	47	R_FRD3
	47	R_GLYCTO2
	47	R_GLYCTO4
	47	R_GRXR
	47	R_GTHOr
	47	R_NADH16pp
	47	R_NADH18pp
	47	R_PAPSR
	47	R_PAPSR2
	47	R_SERt2rpp
	47	R_SERt4pp
	47	R_TRDR
	47	R_TRPS1
	47	R_TRPS2
	47	R_TRPS3
R_Htex	48	R_CA2t3pp
	48	R_CRNDt2rpp
	48	R_CRNt2rpp
	48	R_CRNt8pp
	48	R_DHORD2
	48	R_DHORD5
	48	R_EX_fe3_e
	48	R_EX_h_e
	48	R_FE3tex
	48	R_FEROpp
	48	R_FRD2
	48	R_FRD3
	48	R_GLYCTO2
	48	R_GLYCTO3
	48	R_GRXR
	48	R_GTHOr
	48	R_Htex
	48	R_NADH16pp
	48	R_NADH18pp
	48	R_PAPSR
	48	R_PAPSR2
	48	R_TRDR
R_PUNP1	49	R_ACOATA
	49	R_ADK1
	49	R_ADNK1
	49	R_ADPT
	49	R_ASPO3
	49	R_ASPO5
	49	R_FDH4pp
	49	R_FDH5pp
	49	R_FRD2
	49	R_GLUt2rpp
	49	R_GLUt4pp
	49	R_GLYCLTt2rpp
	49	R_GLYCLTt4pp
	49	R_GRXR
	49	R_GTHOr
	49	R_KAS14
	49	R_KAS15
	49	R_NADH16pp
	49	R_NADH17pp
	49	R_PAPSR
	49	R_PAPSR2
	49	R_PPM
	49	R_PUNP1
	49	R_SERt2rpp
	49	R_SERt4pp
	49	R_THRt2rpp
	49	R_THRt4pp
	49	R_TRDR
R_PFOR	50	R_ACt2rpp
	50	R_ACt4pp
	50	R_ADK1
	50	R_ASPO3
	50	R_ASPO5
	50	R_CRNDt2rpp
	50	R_CRNt2rpp
	50	R_CRNt8pp
	50	R_FLDR
	50	R_GRXR
	50	R_GTHOr
	50	R_NDPK5
	50	R_PAPSR
	50	R_PAPSR2
	50	R_RNDR2
	50	R_RNTR2c
	50	R_THRt2rpp
	50	R_THRt4pp
	50	R_PFOR
R_G6PDH2r	51	R_ACOATA
	51	R_ACt2rpp
	51	R_ACt4pp
	51	R_ADK1
	51	R_CLPNS181pp
	51	R_CRNDt2rpp
	51	R_CRNt2rpp
	51	R_CRNt8pp
	51	R_FRD2
	51	R_G6PDH2r
	51	R_GLYCTO2
	51	R_GLYCTO3
	51	R_GND
	51	R_KAS14
	51	R_KAS15
	51	R_PGL
	51	R_THD2pp
	51	R_THRt2rpp
	51	R_THRt4pp
	51	R_TRPS1
	51	R_TRPS2
	51	R_TRPS3
	51	R_VPAMT
R_ASPO5	52	R_ACOATA
	52	R_ASPO3
	52	R_ASPO5
	52	R_CRNDt2rpp
	52	R_CRNt2rpp
	52	R_CRNt8pp
	52	R_GLYCLTt2rpp
	52	R_GLYCLTt4pp
	52	R_GRXR
	52	R_GTHOr
	52	R_KAS14
	52	R_KAS15
	52	R_PAPSR
	52	R_PAPSR2
	52	R_SERt2rpp
	52	R_SERt4pp
	52	R_TRDR
R_GLYK	53	R_ACOATA
	53	R_ADK1
	53	R_ASPO3
	53	R_ASPO5
	53	R_CRNDt2rpp
	53	R_CRNt2rpp
	53	R_CRNt8pp
	53	R_DHORD2
	53	R_DHORD5
	53	R_F6PA
	53	R_FRD2
	53	R_GLYCDx
	53	R_GLYCLTt2rpp
	53	R_GLYCLTt4pp
	53	R_GLYK
	53	R_KAS14
	53	R_KAS15
	53	R_SERt2rpp
	53	R_SERt4pp
	53	R_TRPS1
	53	R_TRPS2
	53	R_TRPS3
R_PA140abcpp	54	R_ASPO4
	54	R_ASPO5
	54	R_CLPNH140pp
	54	R_FDH4pp
	54	R_FDH5pp
	54	R_FRD2
	54	R_FRD3
	54	R_GLYCLTt2rpp
	54	R_GLYCLTt4pp
	54	R_GLYCTO2
	54	R_GLYCTO4
	54	R_GRXR
	54	R_GTHOr
	54	R_NADH16pp
	54	R_NADH18pp
	54	R_PA140abcpp
	54	R_PAPSR
	54	R_PAPSR2
	54	R_SERt2rpp
	54	R_SERt4pp
	54	R_TRDR
R_ADNt2rpp	55	R_ACOATA
	55	R_ADK1
	55	R_ADNt2pp
	55	R_ADNt2rpp
	55	R_ASPO3
	55	R_ASPO5
	55	R_CRNDt2rpp
	55	R_CRNt2rpp
	55	R_CRNt8pp
	55	R_GRXR
	55	R_GTHOr
	55	R_KAS14
	55	R_KAS15
	55	R_PAPSR
	55	R_PAPSR2
	55	R_TRDR
R_NDPK6	56	R_ACOATA
	56	R_ACt2rpp
	56	R_ACt4pp
	56	R_ADK1
	56	R_ASPO3
	56	R_ASPO5
	56	R_CRNDt2rpp
	56	R_CRNt2rpp
	56	R_CRNt8pp
	56	R_KAS14
	56	R_KAS15
	56	R_LEUt2rpp
	56	R_NDPK6
	56	R_RNDR4
	56	R_RNTR4c
	56	R_SERt2rpp
	56	R_SERt4pp
	56	R_THRt2rpp
	56	R_THRt4pp
	56	R_TRPS1
	56	R_TRPS2
	56	R_TRPS3
	56	R_LEUt4rpp
R_ADNK1	57	R_ADNK1
	57	R_ADPT
	57	R_PPM
	57	R_PUNP1
R_PA181abcpp	58	R_CLPNH181pp
	58	R_CRNDt2rpp
	58	R_CRNt2rpp
	58	R_CRNt8pp
	58	R_FRD3
	58	R_GLYCLTt2rpp
	58	R_GLYCLTt4pp
	58	R_NADH16pp
	58	R_NADH18pp
	58	R_PA181abcpp
	58	R_SERt2rpp
	58	R_SERt4pp
R_12PPDS2tpp	59	R_12PPDStpp
	59	R_ADK1
	59	R_ASPO3
	59	R_ASPO5
	59	R_CA2t3pp
	59	R_CRNDt2rpp
	59	R_CRNt2rpp
	59	R_CRNt8pp
	59	R_GLYCLTt2rpp
	59	R_GLYCLTt4pp
	59	R_SERt2rpp
	59	R_SERt4pp
	59	R_12PPDS2tpp
R_EAR120x	60	R_CRNDt2rpp
	60	R_CRNt2rpp
	60	R_CRNt8pp
	60	R_EAR120x
	60	R_EAR120y
	60	R_GLYCLTt2rpp
	60	R_GLYCLTt4pp
	60	R_SERt2rpp
	60	R_SERt4pp
R_CYTK1	61	R_ACt2rpp
	61	R_ACt4pp
	61	R_ADK1
	61	R_CMPN
	61	R_CRNDt2rpp
	61	R_CRNt2rpp
	61	R_CRNt8pp
	61	R_CYTK1
	61	R_GRXR
	61	R_GTHOr
	61	R_LEUt2rpp
	61	R_PAPSR
	61	R_PAPSR2
	61	R_PYNP2r
	61	R_SERt2rpp
	61	R_SERt4pp
	61	R_THRt2rpp
	61	R_THRt4pp
	61	R_TRDR
	61	R_URIK2
	61	R_CSND
	61	R_LEUt4rpp
R_THMDt2pp	62	R_ADK1
	62	R_ASPO3
	62	R_ASPO5
	62	R_CRNDt2rpp
	62	R_CRNt2rpp
	62	R_CRNt8pp
	62	R_GLUt2rpp
	62	R_GLUt4pp
	62	R_THMDt2pp
	62	R_THMDt2rpp
	62	R_THRt2rpp
	62	R_THRt4pp
R_THRt2rpp	63	R_ACOATA
	63	R_ADK1
	63	R_CRNDt2rpp
	63	R_CRNt2rpp
	63	R_CRNt8pp
	63	R_FRD2
	63	R_GLUt2rpp
	63	R_GLUt4pp
	63	R_GLYCTO2
	63	R_GLYCTO3
	63	R_KAS14
	63	R_KAS15
	63	R_NADH16pp
	63	R_NADH17pp
	63	R_THRt2rpp
	63	R_THRt4pp
	63	R_TRPS1
	63	R_TRPS2
	63	R_TRPS3
R_HPYRI	64	R_ASPO4
	64	R_ASPO5
	64	R_DHORD2
	64	R_DHORD5
	64	R_FDH4pp
	64	R_FDH5pp
	64	R_FRD2
	64	R_GLYCLTt2rpp
	64	R_GLYCLTt4pp
	64	R_GLYCTO2
	64	R_GLYCTO3
	64	R_GRXR
	64	R_GTHOr
	64	R_HPYRI
	64	R_HPYRRx
	64	R_NADH16pp
	64	R_NADH17pp
	64	R_PAPSR
	64	R_PAPSR2
	64	R_SERt2rpp
	64	R_SERt4pp
	64	R_TRDR
	64	R_TRSARr
R_FE2tex	65	R_ACt2rpp
	65	R_ACt4pp
	65	R_ADK1
	65	R_ARBTNR1
	65	R_ARBTNabcpp
	65	R_ARBTNexs
	65	R_ARBTNtex
	65	R_ARBTNtonex
	65	R_ARBTNtpp
	65	R_CRNDt2rpp
	65	R_CRNt2rpp
	65	R_CRNt8pp
	65	R_EX_fe2_e
	65	R_EX_fe3_e
	65	R_FADRx
	65	R_FE2tex
	65	R_FE2tpp
	65	R_GRXR
	65	R_GTHOr
	65	R_PAPSR
	65	R_PAPSR2
	65	R_THRt2rpp
	65	R_THRt4pp
	65	R_TRDR
	65	R_TRPS1
	65	R_TRPS2
	65	R_TRPS3
R_EAR100x	66	R_EAR100x
	66	R_EAR100y
R_PPM	67	R_ACOATA
	67	R_ACt2rpp
	67	R_ACt4pp
	67	R_ADK1
	67	R_ADNK1
	67	R_ADPT
	67	R_ASPO3
	67	R_ASPO5
	67	R_CRNDt2rpp
	67	R_CRNt2rpp
	67	R_CRNt8pp
	67	R_FRD2
	67	R_GRXR
	67	R_GTHOr
	67	R_KAS14
	67	R_KAS15
	67	R_NADH16pp
	67	R_NADH17pp
	67	R_PAPSR
	67	R_PAPSR2
	67	R_PPM
	67	R_PUNP1
	67	R_THRt2rpp
	67	R_THRt4pp
	67	R_TRDR
R_12PPDStpp	68	R_12PPDStpp
	68	R_ADK1
	68	R_ASPO3
	68	R_ASPO5
	68	R_CA2t3pp
	68	R_CRNDt2rpp
	68	R_CRNt2rpp
	68	R_CRNt8pp
	68	R_GLYCLTt2rpp
	68	R_GLYCLTt4pp
	68	R_SERt2rpp
	68	R_SERt4pp
	68	R_12PPDS2tpp

## Sheet: Gene_clusters
Switch	Genes w repetitions	Unique genes	Num reacs
R_KAS14	25	24	15
R_EAR121x	2	1	2
R_GLYCtpp	40	34	26
R_EAR181x	24	21	16
R_SO3R	12	10	11
R_PG180abcpp	6	3	4
R_3OAR160	46	26	40
R_ASNS2	18	14	18
R_GLCtex	35	31	22
R_3OAR120	87	44	64
R_O2tex	83	54	61
R_3OAS120	93	50	68
R_PG160abcpp	6	3	4
R_PAPA181pp	9	6	11
R_TRPS2	3	1	3
R_MTHFD	44	40	30
R_MTHFC	48	43	32
R_PG140abcpp	29	24	18
R_NDPK1	32	27	22
R_G5SD	20	15	19
R_3HAD120	95	50	72
R_PGPP160	21	13	16
R_PGPP161	11	8	7
R_EAR60x	2	1	2
R_PG181abcpp	10	7	8
R_PAPSR	13	13	5
R_PGPP140	6	3	4
R_3HAD140	48	32	41
R_CBMKr	22	16	20
R_EAR40x	2	1	2
R_3HAD160	47	28	39
R_PG161abcpp	41	30	28
R_Kt2pp	37	30	24
R_GLU5K	14	12	13
R_3OAS180	48	42	34
R_OA5L_ST	28	20	24
R_EAR161x	23	20	14
R_RNTR1c	41	34	25
R_3HAD180	42	38	29
R_EAR80x	2	1	2
R_PGPP180	21	13	18
R_PGPP181	24	21	12
R_DHORD2	26	23	17
R_TRDR	28	26	17
R_PAPA161pp	32	26	23
R_GLUDy	33	29	24
R_EAR141x	32	26	23
R_ADK3	27	23	18
R_ZN2tpp	7	7	5
R_VALTA	34	30	25
R_3OAR180	29	24	26
R_3OAS160	30	16	24
R_GARFT	21	12	21
R_TRPS3	13	8	13
R_PPC	19	19	11
R_PIt2rpp	28	24	20
R_NDPK3	43	33	25
R_ORNDC	10	10	6
R_RNTR2c	46	39	27
R_FORtppi	24	20	21
R_RNTR3c	8	8	3

## Sheet: PSL cluster entanglement
Code	Switch
1	3HAD120
2	3HAD140
3	3HAD160
4	3HAD180
5	3OAR120
6	3OAR160
7	3OAR180
8	3OAS120
9	3OAS160
10	3OAS180
11	ADK3
12	ASNS2
13	DHORD2
14	EAR121x
15	EAR141x
16	EAR161x
17	EAR181x
18	EAR40x
19	EAR60x
20	EAR80x
21	FORtppi
22	G5SD
23	GARFT
24	GLCtex
25	GLU5K
26	GLUDy
27	GLYCtpp
28	KAS14
29	Kt2pp
30	MTHFC
31	MTHFD
32	NDPK1
33	NDPK3
34	O2tex
35	ORNDC
36	PAPA161pp
37	PAPA181pp
38	PAPSR
39	PG140abcpp
40	PG160abcpp
41	PG161abcpp
42	PG180abcpp
43	PG181abcpp
44	PGPP140
45	PGPP160
46	PGPP161
47	PGPP180
48	PGPP181
49	PIt2rpp
50	PPC
51	RNTR1c
52	RNTR2c
53	RNTR3c
54	TRDR
55	TRPS2
56	TRPS3
57	VALTA
58	ZN2tpp
59	SO3R
60	CBMKr
61	OA5L_ST
*Directed graph
1	5	0.833333
5	1	0.9375
1	8	0.861111
8	1	0.911765
2	1	1
6	1	0.9
9	1	1
10	1	0.794118
4	1	0.862069
7	1	0.846154
38	1	1
55	1	1
2	8	0.878049
3	6	0.769231
3	5	0.769231
3	8	0.846154
9	3	1
4	5	0.896552
4	10	0.793103
4	8	0.793103
38	4	1
55	4	1
5	8	0.859375
8	5	0.808824
6	5	0.9
9	5	1
7	5	0.846154
32	5	0.772727
38	5	1
55	5	1
9	6	1
7	6	1
12	6	0.833333
55	6	1
55	7	1
9	8	1
10	8	0.911765
27	8	0.807692
13	8	0.882353
39	8	0.777778
28	8	0.8
38	8	1
13	10	0.764706
38	10	1
11	51	0.944444
50	11	0.818182
38	11	1
12	26	0.833333
55	12	1
59	13	0.818182
13	51	0.823529
13	57	0.823529
13	27	0.882353
13	41	0.764706
13	29	0.764706
13	52	0.764706
38	13	1
15	41	0.913043
15	52	0.782609
16	15	0.857143
38	15	1
55	15	1
16	24	0.857143
16	41	0.857143
16	51	0.857143
38	16	1
55	16	1
17	30	0.8125
17	57	0.8125
38	17	1
21	30	0.761905
55	21	1
25	22	0.846154
56	23	0.769231
55	23	1
28	24	0.866667
38	24	1
55	24	1
25	51	0.769231
59	25	0.818182
26	30	0.791667
26	32	0.791667
32	26	0.863636
49	26	0.8
38	26	1
55	26	1
39	27	0.777778
28	27	0.8
38	27	1
28	52	0.933333
28	39	0.8
38	28	1
29	41	0.791667
29	52	0.791667
38	29	1
31	30	0.766667
57	30	0.76
38	30	1
55	30	1
32	31	0.772727
38	31	1
55	31	1
32	51	0.818182
32	49	0.818182
49	32	0.9
50	32	0.818182
38	32	1
55	32	1
50	33	0.818182
38	33	1
38	36	1
38	48	1
38	39	1
38	50	1
38	41	1
38	51	1
38	49	1
38	54	1
38	57	1
38	52	1
44	39	1
40	45	1
52	41	0.777778
56	41	0.769231
46	41	0.857143
55	41	1
42	47	1
49	51	0.9
50	49	0.818182
55	49	1
50	51	0.818182
59	51	0.818182
55	51	1
55	60	1
55	56	1
